# Supplementary material for: GSDMD enhances cisplatin-induced apoptosis by promoting the phosphorylation of eIF2α and activating the ER-stress response
Source: PubMed Central journal article supplement (PMC8921229; doi:10.1038/s41420-022-00915-8), 2022-03-14

Figure S1. Changes in IC50 of cisplatin after GSDMD was knocked down by siRNA in cells with high GSDMD expression.

- a. After using different siRNAs to knock down GSDMD in um1 cell lines, the IC50 of cisplatin was significantly increased.
- b. B. After using different siRNAs to knock down GSDMD in Cal-33 cell lines, the IC50 of cisplatin was significantly increased.
- c. C. After using different siRNAs to knock down GSDMD in the hela cell line, the IC50 of cisplatin was significantly increased.

Figure S2. GSDMD increases the cisplatin chemosensitivity of cells through a non-pyroptotic pathway.

- a. After treatment with cisplatin for 24 h, the release of TNF- $\alpha$  in the medium was assessed by ELISA; the results showed that cisplatin treatment did not increase the release of IL-1 $\beta$  in Cal-27 and SCC-9 cells.

Figure S3. Statistical analysis results of the ratio of pyroptotic cells to total cells in live-image observation.

The statistical results showed that in each experimental group, no matter whether GSDMD was overexpressed or not, no pyroptosis occurred after cisplatin treatment. In the two positive controls, about 50% of the cells had undergone pyroptosis.

Figure S4. Western blotting results showed that the expression of NLRP-3 in the two head and neck squamous cell carcinoma cell lines (Cal-27 and HSC-6) was low or absent. Human monocytes (THP-1) and human oral mucosal epithelial cells (hok) were used as positive controls.

Figure S5. The expression levels of multiple NLRs and TLRs in tumor cells.

- a. NLRP1 is highly expressed in SCC-9 and Cal-27 ( $p < 0.001$ ), compared with human monocytes.
- b. B. TLR4 is highly expressed in SCC-9 ( $p < 0.001$ ). However, the expression is low in CAL-27 and Hela ( $p < 0.01$ ), compared with human monocytes.
- c. C. NLRP1 is almost not expressed in SCC-9 and Cal-27 ( $p < 0.001$ ).
- d. D. The expression of TLR9 in SCC-9 and Cal-27 is low ( $p < 0.001$ ).

Figure S6. KEGG analysis of mass spectrometry results

Figure S7. The phosphorylation of eIF2 $\alpha$  in CAL-27 cells overexpressing GSDME.

Western blot showed that the phosphorylation level of eIF2 $\alpha$  in cells

overexpressing GSDME did not change significantly.

Figure S8. Western blot was used to detect the phosphorylation levels of GSDMD and eIF2 $\alpha$ .

Western blot results show that cisplatin can increase the level of eIF2 $\alpha$  phosphorylation, and PERK inhibitor can eliminate this change.

Figure S9. PERK knockdown efficiency of siRNA and detection of apoptosis level after PERK knockdown.

- a. Western blotting showed that of the two PERK siRNAs, si1# can significantly knock down the expression of PERK.
- b. The results of flow cytometry detection of apoptosis showed that tumor cells after knocking down PERK, including CAL-27 and SCC-9, showed lower levels of apoptosis in cisplatin treatment.

Figure S10. The tumor homogenate protein after chemotherapy of transplanted tumor in nude mice was used in immunoblotting experiments.

The results showed that the use of PERK inhibitors can reduce the phosphorylation level of eIF2 $\alpha$ .

Figure S11. Effect of GSDMD on eIF2 $\alpha$  phosphorylation in non-cisplatin chemotherapy

The phosphorylation level of eIF2 $\alpha$  at 0, 4, 6, and 12 hours after the use of TG in the control group and overexpression group. The phosphorylation level of eIF2 $\alpha$  was higher in the overexpression group at 0h. The higher phosphorylation level of eIF2 $\alpha$  at 4h peaked in both groups. At 6h, the phosphorylation level of eIF2 $\alpha$  in the overexpression group decreased more rapidly.

Figure S1

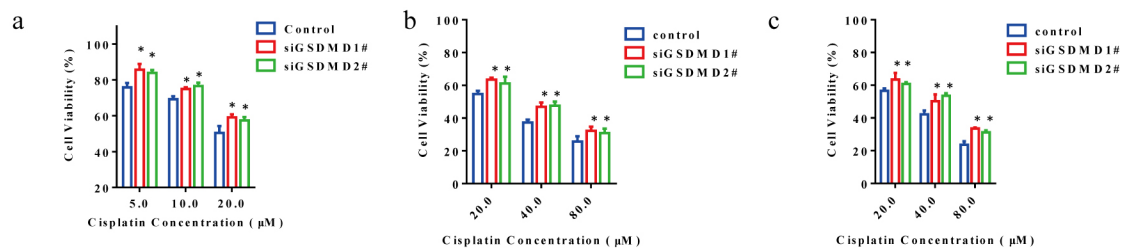

Figure S2

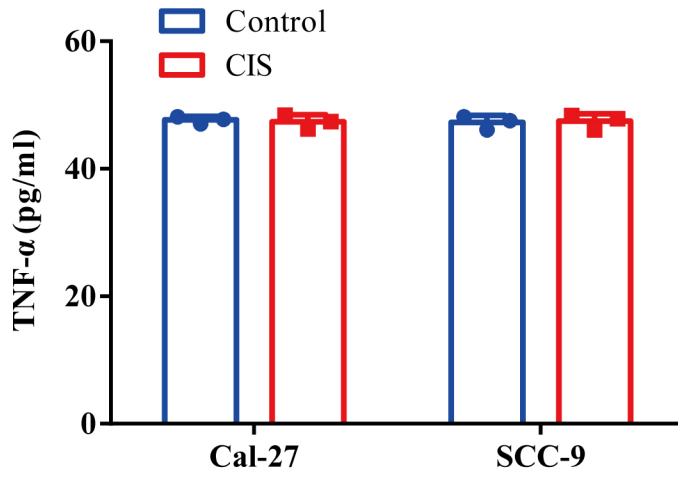

Figure S3

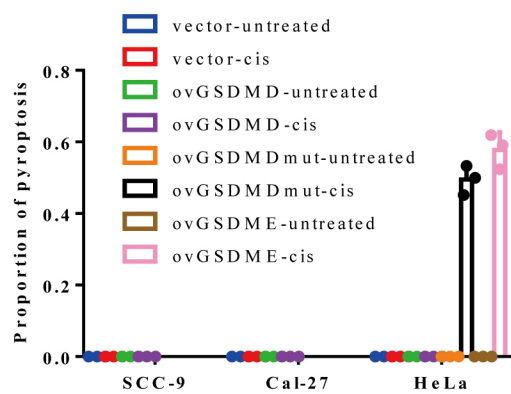

Figure S4

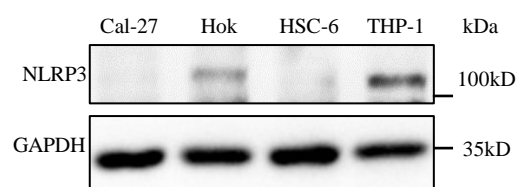

Figure S5

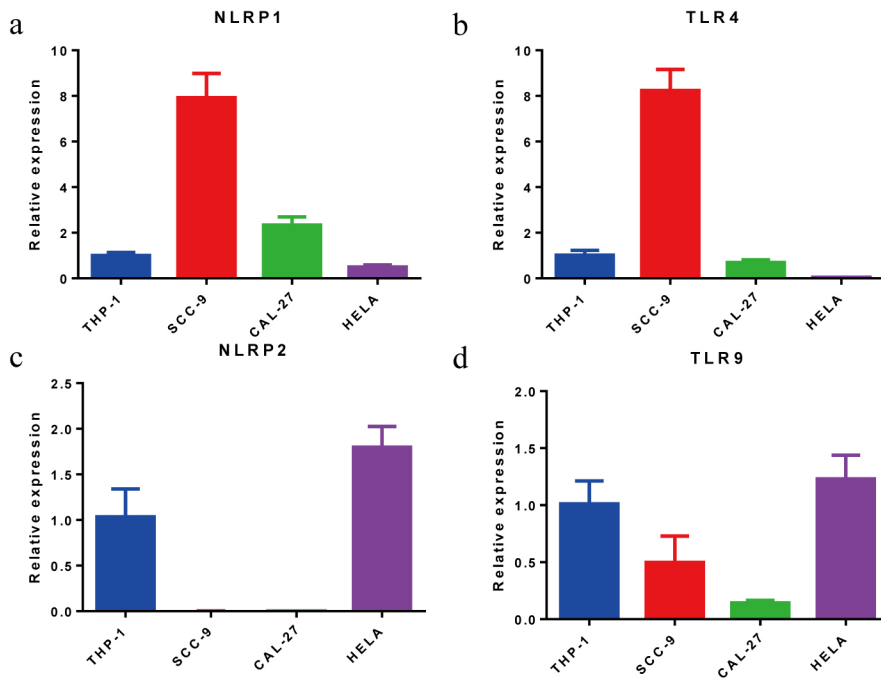

Figure S6

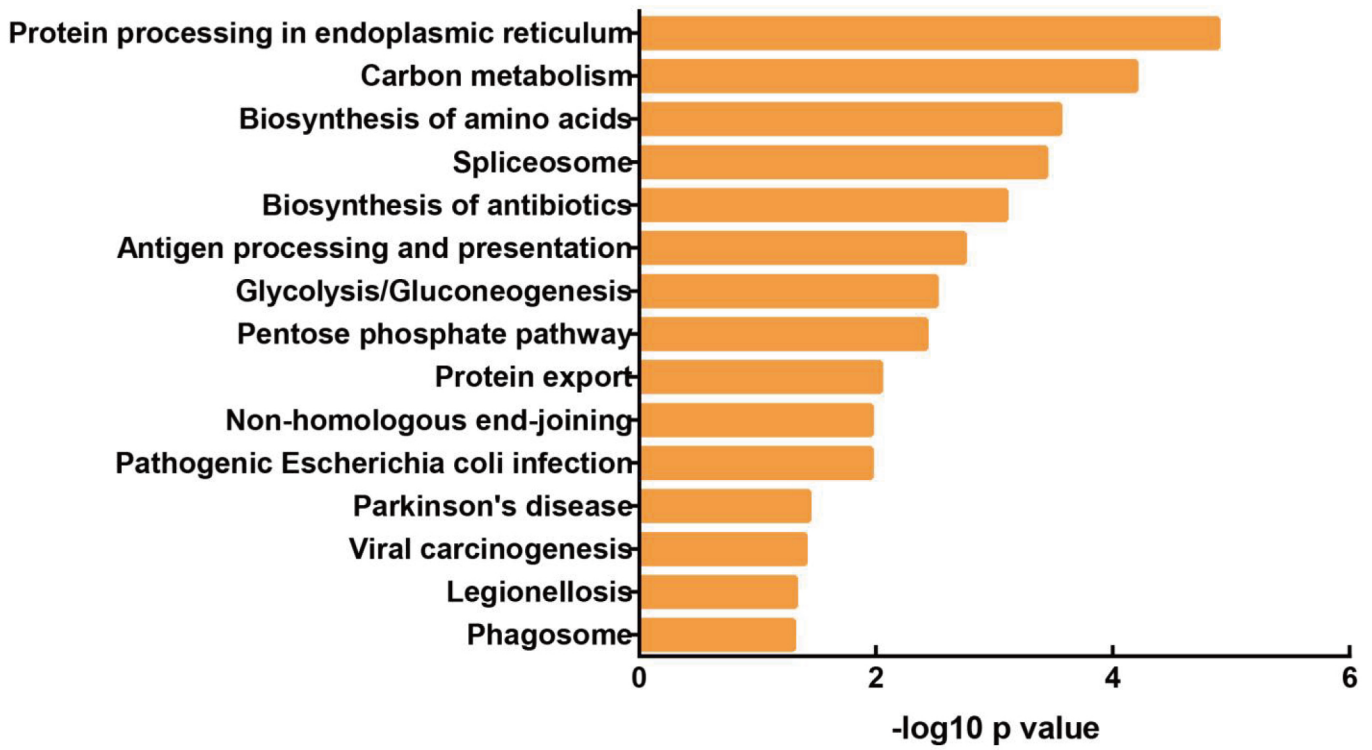



Figure S7

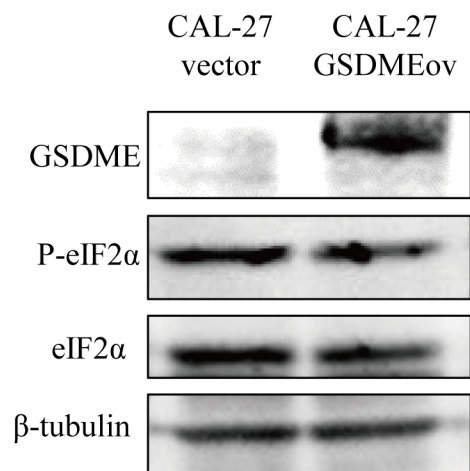

Figure S8

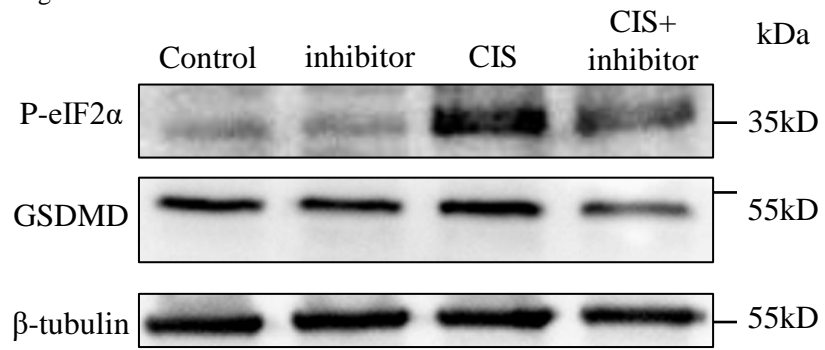

Figure S9

a

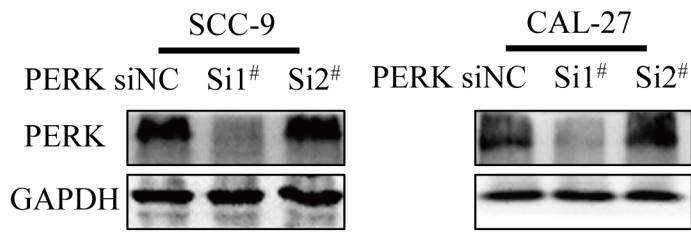

b

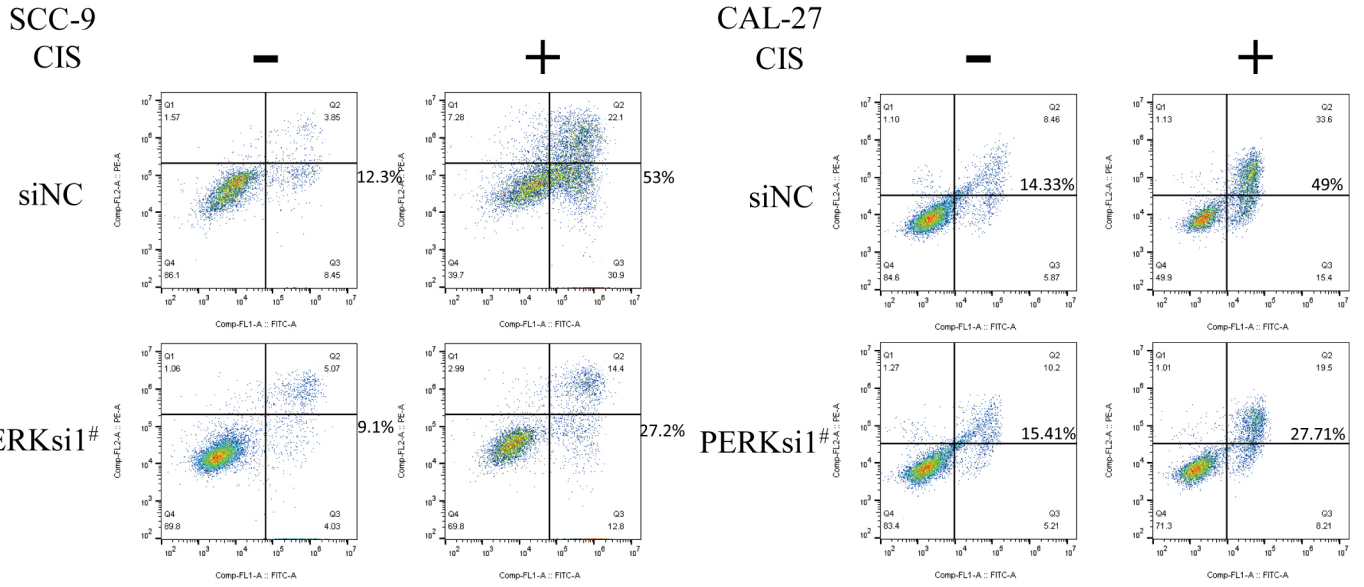

Figure S10

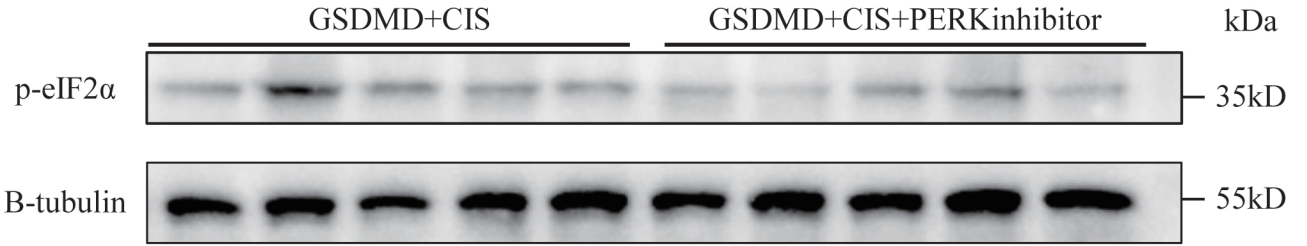



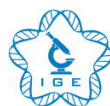**CELL LINE AUTHENTICATION SERVICE**

## STR Profile Report

|                               |                                                                                                                                                                                                                                                                                                                                                                                                                                                                  |
|-------------------------------|------------------------------------------------------------------------------------------------------------------------------------------------------------------------------------------------------------------------------------------------------------------------------------------------------------------------------------------------------------------------------------------------------------------------------------------------------------------|
| <b>Sample Submitted By:</b>   | <b>HUANG ZI XIAN</b>                                                                                                                                                                                                                                                                                                                                                                                                                                             |
| <b>Email Address:</b>         | <b>258001917@qq.com</b>                                                                                                                                                                                                                                                                                                                                                                                                                                          |
| <b>Project Number:</b>        | <b>IGXN21174</b>                                                                                                                                                                                                                                                                                                                                                                                                                                                 |
| <b>Cell Line Designation:</b> | <b>SCC-9</b>                                                                                                                                                                                                                                                                                                                                                                                                                                                     |
| <b>Date Sample Received:</b>  | <b>2021-08-15</b>                                                                                                                                                                                                                                                                                                                                                                                                                                                |
| <b>Date Reported:</b>         | <b>2021-08-18</b>                                                                                                                                                                                                                                                                                                                                                                                                                                                |
| <b>Methodology :</b>          | The cell line sample was processed and 21 short tandem repeat (STR) loci including the gender determining locus, Amelogenin, were amplified using the IGE STE 21 commercial kit in an ABI 9700 PCR system. The PCR product was processed using an ABI Prism® 3730XL Genetic Analyzer. Data were analyzed using GeneMapper® ID-X v1.5 software (Applied Biosystems). Appropriate positive and negative controls were run and confirmed for each sample submitted. |
| <b>Data Interpretation:</b>   | Cell lines were authenticated using Short Tandem Repeat (STR) analysis as described in 2012 in ANSI Standard (ASN-0002) by the ATCC Standards Development Organization (SDO) and in Capes-Davis et al., Match criteria for human cell line authentication: Where do we draw the line? Int J Cancer. 2013;132(11):2510-9.                                                                                                                                         |

**Results**

| Alleles<br>STR profile | Allele 1   | Allele 2 | Allele 3 | Allele 4 |
|------------------------|------------|----------|----------|----------|
|                        | Amelogenin | X        | Y        |          |
| D3S1358                | 15         | 15       |          |          |
| vWA                    | 17         | 17       |          |          |
| D7S820                 | 8          | 8        |          |          |
| CSF1PO                 | 11         | 11       |          |          |
| PentaE                 | 11         | 11       |          |          |
| D8S1179                | 13         | 13       |          |          |
| D21S11                 | 28         | 28       |          |          |
| D16S539                | 10         | 11       |          |          |
| D2S1338                | 19         | 21       |          |          |
| PentaD                 | 9          | 9        |          |          |
| D19S433                | 12         | 14       |          |          |

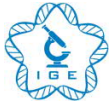

**CELL LINE AUTHENTICATION SERVICE**

**STR Profile Report**

| Alleles     | Allele 1 | Allele 2 | Allele 3 | Allele 4 |
|-------------|----------|----------|----------|----------|
| STR profile |          |          |          |          |
| TH01        | 8        | 9        |          |          |
| D13S317     | 9        | 9        |          |          |
| TPOX        | 9        | 11       |          |          |
| D18S51      | 12       | 14       |          |          |
| D6S1043     | 11       | 18       |          |          |
| D1S1656     | 15       | 17       |          |          |
| D5S818      | 12       | 12       |          |          |
| D12S391     | 20       | 20       |          |          |
| FGA         | 20       | 25       |          |          |

Cell lines with ≥80% match are considered to be related; i.e., derived from a common ancestry. Cell lines with between a 55% to 80% match require further profiling for authentication of relatedness.

The submitted sample profile is human, but not a match for any profile in the DSMZ/ATCC/STR STR databases which include approximately 2455 different type of cells.

The submitted profile is an exact match for the following IGE human cell line(s) in the IGE STR database (8 core loci plus Amelogenin): SCC-9

The submitted profile is similar to the following human cell line(s):

| Matches: |               |          |                  |        |         |        |         |       |      |     |      |        |
|----------|---------------|----------|------------------|--------|---------|--------|---------|-------|------|-----|------|--------|
| NO.      | Percent Match | Cell No. | Cell name        | D5S818 | D13S317 | D7S820 | D16S539 | vWA   | TH01 | AM  | TPOX | CSF1PO |
|          |               |          | Query(Your Cell) | 12,12  | 9,9     | 8,8    | 10,11   | 17,17 | 8,9  | X,Y | 9,11 | 11,11  |
| 1        | 100%          |          | SCC-9            | 12,12  | 9,9     | 8,8    | 10,11   | 17,17 | 8,9  | X,Y | 9,11 | 11,11  |
| 2        | 100%          | CRL-1629 | SCC-9            | 12,12  | 9,9     | 8,8    | 10,11   | 17,17 | 8,9  | X,Y | 9,11 | 11,11  |



# CELL LINE AUTHENTICATION SERVICE

## STR Profile Report

### STR Typing

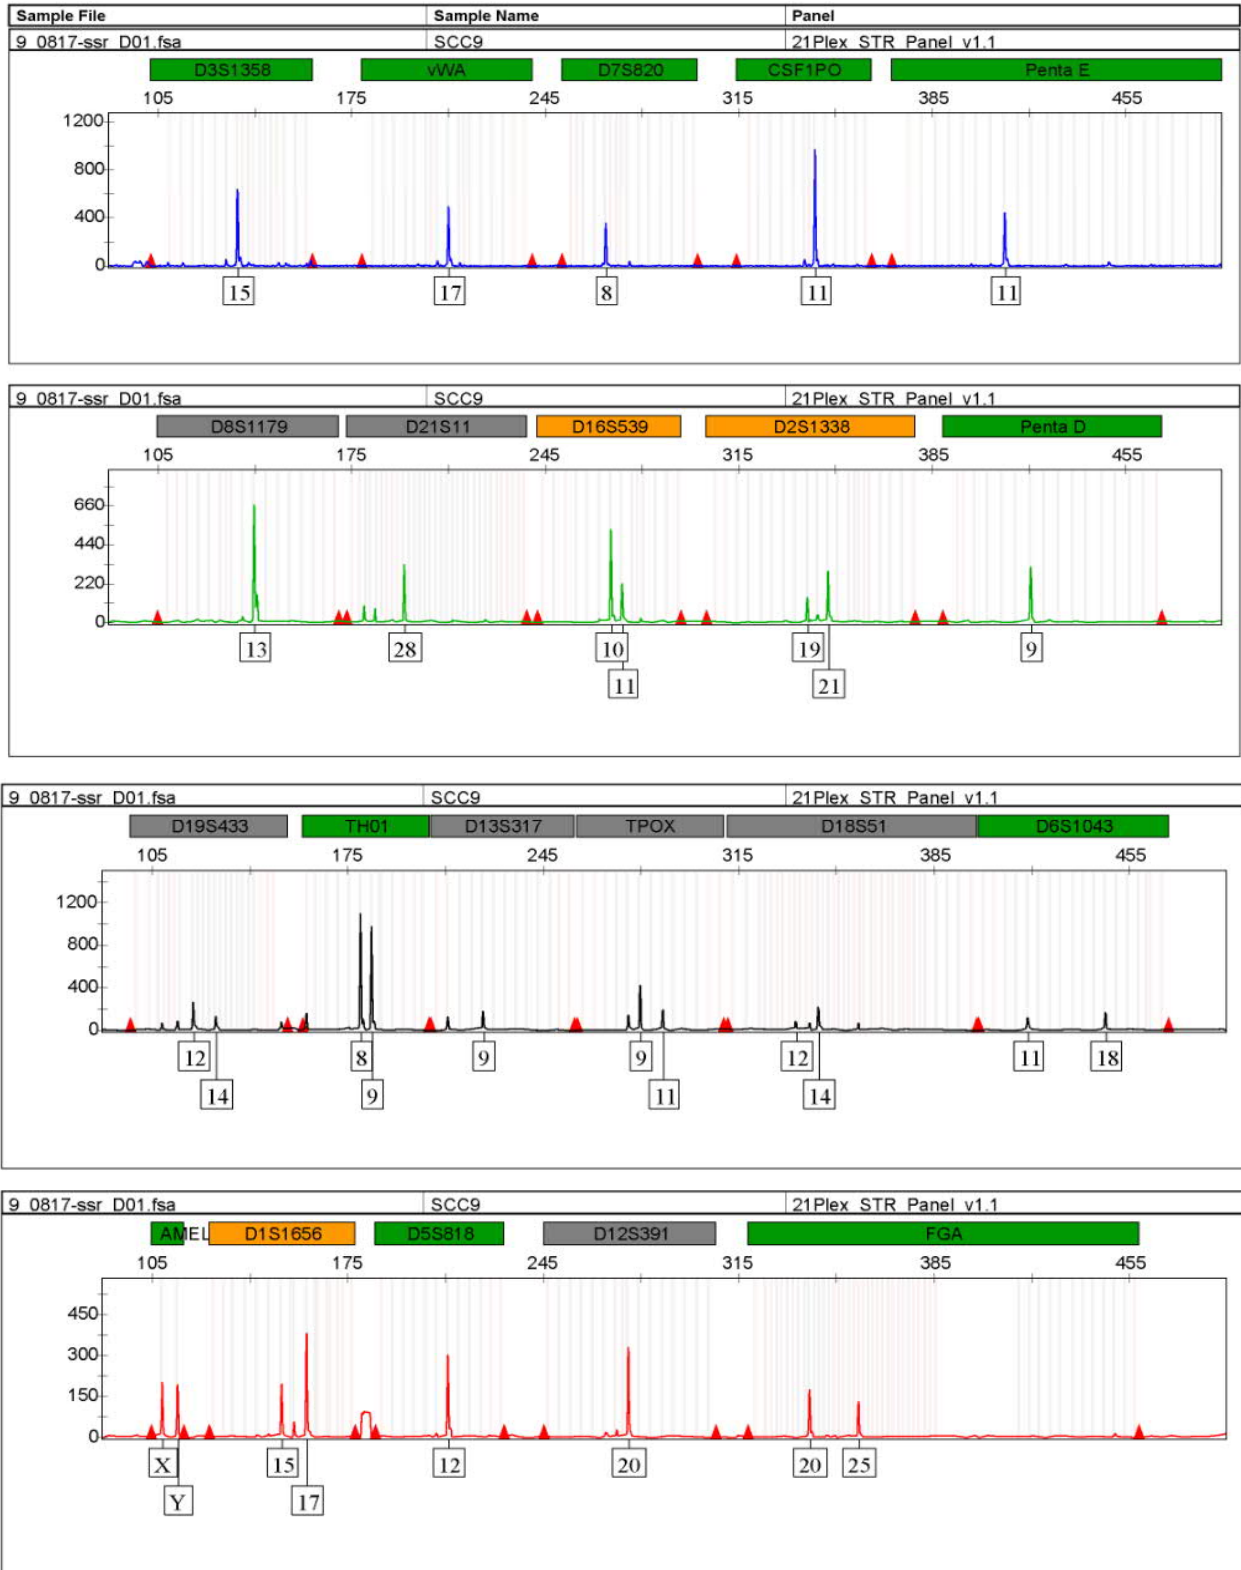



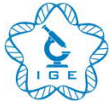

IGE BIOTECH INC., LTD.

## **CELL LINE AUTHENTICATION SERVICE**

### STR Profile Report

#### **Disclaimer:**

IGE Biotechnology performs STR Profiling following ISO 9001:2008 and ISO/IEC 17025:2005 quality standards. There are no warranties with respect to the services or results supplied, express or implied, including, without limitation, any implied warranty of merchantability or fitness for a particular purpose. IGE Biotechnology is not liable for any damages or injuries resulting from receipt and/or improper, inappropriate, negligent or other wrongful use of the test results supplied, and/or from misidentification, misrepresentation, or lack of accuracy of those results. Your exclusive remedy against IGE Biotechnology and those supplying materials used in the services for any losses or damage of any kind whatsoever, whether in contract, tort, or otherwise, shall be, at IGE Biotechnology's option, refund of the fee paid for such service or repeat of the service.

#### **Contact:**

IGE Biotechnology Inc. LTD.  
020-89053723  
info@igebio.com  
12 3rd Luoxuan Rd., Building 4 Room 505  
Guangzhou International Biotech Island  
Guangzhou, China 510320  
<http://www.igebio.com>

**CELL LINE AUTHENTICATION SERVICE**

## STR Profile Report

|                               |                                                                                                                                                                                                                                                                                                                                                                                                                                                                  |
|-------------------------------|------------------------------------------------------------------------------------------------------------------------------------------------------------------------------------------------------------------------------------------------------------------------------------------------------------------------------------------------------------------------------------------------------------------------------------------------------------------|
| <b>Sample Submitted By:</b>   | <b>HUANG ZI XIAN</b>                                                                                                                                                                                                                                                                                                                                                                                                                                             |
| <b>Email Address:</b>         | <b>258001917@qq.com</b>                                                                                                                                                                                                                                                                                                                                                                                                                                          |
| <b>Project Number:</b>        | <b>IGXN21174</b>                                                                                                                                                                                                                                                                                                                                                                                                                                                 |
| <b>Cell Line Designation:</b> | <b>SCC-9</b>                                                                                                                                                                                                                                                                                                                                                                                                                                                     |
| <b>Date Sample Received:</b>  | <b>2021-08-15</b>                                                                                                                                                                                                                                                                                                                                                                                                                                                |
| <b>Date Reported:</b>         | <b>2021-08-18</b>                                                                                                                                                                                                                                                                                                                                                                                                                                                |
| <b>Methodology :</b>          | The cell line sample was processed and 21 short tandem repeat (STR) loci including the gender determining locus, Amelogenin, were amplified using the IGE STE 21 commercial kit in an ABI 9700 PCR system. The PCR product was processed using an ABI Prism® 3730XL Genetic Analyzer. Data were analyzed using GeneMapper® ID-X v1.5 software (Applied Biosystems). Appropriate positive and negative controls were run and confirmed for each sample submitted. |
| <b>Data Interpretation:</b>   | Cell lines were authenticated using Short Tandem Repeat (STR) analysis as described in 2012 in ANSI Standard (ASN-0002) by the ATCC Standards Development Organization (SDO) and in Capes-Davis et al., Match criteria for human cell line authentication: Where do we draw the line? Int J Cancer. 2013;132(11):2510-9.                                                                                                                                         |

**Results**

| Alleles     | Allele 1 | Allele 2 | Allele 3 | Allele 4 |
|-------------|----------|----------|----------|----------|
| STR profile |          |          |          |          |
| Amelogenin  | X        | Y        |          |          |
| D3S1358     | 15       | 15       |          |          |
| vWA         | 17       | 17       |          |          |
| D7S820      | 8        | 8        |          |          |
| CSF1PO      | 11       | 11       |          |          |
| PentaE      | 11       | 11       |          |          |
| D8S1179     | 13       | 13       |          |          |
| D21S11      | 28       | 28       |          |          |
| D16S539     | 10       | 11       |          |          |
| D2S1338     | 19       | 21       |          |          |
| PentaD      | 9        | 9        |          |          |
| D19S433     | 12       | 14       |          |          |



**CELL LINE AUTHENTICATION SERVICE**

STR Profile Report

| Alleles     | Allele 1 | Allele 2 | Allele 3 | Allele 4 |
|-------------|----------|----------|----------|----------|
| STR profile |          |          |          |          |
| TH01        | 8        | 9        |          |          |
| D13S317     | 9        | 9        |          |          |
| TPOX        | 9        | 11       |          |          |
| D18S51      | 12       | 14       |          |          |
| D6S1043     | 11       | 18       |          |          |
| D1S1656     | 15       | 17       |          |          |
| D5S818      | 12       | 12       |          |          |
| D12S391     | 20       | 20       |          |          |
| FGA         | 20       | 25       |          |          |

Cell lines with ≥80% match are considered to be related; i.e., derived from a common ancestry. Cell lines with between a 55% to 80% match require further profiling for authentication of relatedness.

The submitted sample profile is human, but not a match for any profile in the DSMZ/ATCC/STR STR databases which include approximately 2455 different type of cells.

The submitted profile is an exact match for the following IGE human cell line(s) in the IGE STR database (8 core loci plus Amelogenin): SCC-9

The submitted profile is similar to the following human cell line(s):

| Matches: |               |          |                  |        |         |        |         |       |      |     |      |        |
|----------|---------------|----------|------------------|--------|---------|--------|---------|-------|------|-----|------|--------|
| NO.      | Percent Match | Cell No. | Cell name        | D5S818 | D13S317 | D7S820 | D16S539 | vWA   | TH01 | AM  | TPOX | CSF1PO |
|          |               |          | Query(Your Cell) | 12,12  | 9,9     | 8,8    | 10,11   | 17,17 | 8,9  | X,Y | 9,11 | 11,11  |
| 1        | 100%          |          | SCC-9            | 12,12  | 9,9     | 8,8    | 10,11   | 17,17 | 8,9  | X,Y | 9,11 | 11,11  |
| 2        | 100%          | CRL-1629 | SCC-9            | 12,12  | 9,9     | 8,8    | 10,11   | 17,17 | 8,9  | X,Y | 9,11 | 11,11  |



# CELL LINE AUTHENTICATION SERVICE

## STR Profile Report

### STR Typing





IGE BIOTECH INC., LTD.

## **CELL LINE AUTHENTICATION SERVICE**

### STR Profile Report

#### **Disclaimer:**

IGE Biotechnology performs STR Profiling following ISO 9001:2008 and ISO/IEC 17025:2005 quality standards. There are no warranties with respect to the services or results supplied, express or implied, including, without limitation, any implied warranty of merchantability or fitness for a particular purpose. IGE Biotechnology is not liable for any damages or injuries resulting from receipt and/or improper, inappropriate, negligent or other wrongful use of the test results supplied, and/or from misidentification, misrepresentation, or lack of accuracy of those results. Your exclusive remedy against IGE Biotechnology and those supplying materials used in the services for any losses or damage of any kind whatsoever, whether in contract, tort, or otherwise, shall be, at IGE Biotechnology's option, refund of the fee paid for such service or repeat of the service.

#### **Contact:**

IGE Biotechnology Inc. LTD.  
020-89053723  
info@igebio.com  
12 3rd Luoxuan Rd., Building 4 Room 505  
Guangzhou International Biotech Island  
Guangzhou, China 510320  
<http://www.igebio.com>

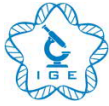

|                               |                                                                                                                                                                                                                                                                                                                                                                                                                                                                  |
|-------------------------------|------------------------------------------------------------------------------------------------------------------------------------------------------------------------------------------------------------------------------------------------------------------------------------------------------------------------------------------------------------------------------------------------------------------------------------------------------------------|
| <b>Sample Submitted By:</b>   | <b>HUANG ZI XIAN</b>                                                                                                                                                                                                                                                                                                                                                                                                                                             |
| <b>Email Address:</b>         | <b>258001917@qq.com</b>                                                                                                                                                                                                                                                                                                                                                                                                                                          |
| <b>Project Number:</b>        | <b>IGXN20028</b>                                                                                                                                                                                                                                                                                                                                                                                                                                                 |
| <b>Cell Line Designation:</b> | <b>CAL-27</b>                                                                                                                                                                                                                                                                                                                                                                                                                                                    |
| <b>Date Sample Received:</b>  | <b>2020-04-01</b>                                                                                                                                                                                                                                                                                                                                                                                                                                                |
| <b>Date Reported:</b>         | <b>2020-04-03</b>                                                                                                                                                                                                                                                                                                                                                                                                                                                |
| <b>Methodology :</b>          | The cell line sample was processed and 21 short tandem repeat (STR) loci including the gender determining locus, Amelogenin, were amplified using the IGE STE 21 commercial kit in an ABI 9700 PCR system. The PCR product was processed using an ABI Prism® 3730XL Genetic Analyzer. Data were analyzed using GeneMapper® ID-X v1.5 software (Applied Biosystems). Appropriate positive and negative controls were run and confirmed for each sample submitted. |
| <b>Data Interpretation:</b>   | Cell lines were authenticated using Short Tandem Repeat (STR) analysis as described in 2012 in ANSI Standard (ASN-0002) by the ATCC Standards Development Organization (SDO) and in Capes-Davis et al., Match criteria for human cell line authentication: Where do we draw the line? Int J Cancer. 2013;132(11):2510-9.                                                                                                                                         |

**Results**

| Alleles<br>STR profile | Allele 1   | Allele 2 | Allele 3 | Allele 4 |
|------------------------|------------|----------|----------|----------|
|                        | Amelogenin | X        | X        |          |
| D3S1358                | 16         | 16       |          |          |
| vWA                    | 14         | 17       |          |          |
| D7S820                 | 10         | 10       |          |          |
| CSF1PO                 | 10         | 12       |          |          |
| PentaE                 | 7          | 7        |          |          |
| D8S1179                | 13         | 15       |          |          |
| D21S11                 | 28         | 29       |          |          |
| D16S539                | 11         | 12       |          |          |
| D2S1338                | 23         | 24       |          |          |
| PentaD                 | 9          | 10       |          |          |
| D19S433                | 14         | 15.2     |          |          |



**CELL LINE AUTHENTICATION SERVICE**

**STR Profile Report**

| Alleles     | Allele 1 | Allele 2 | Allele 3 | Allele 4 |
|-------------|----------|----------|----------|----------|
| STR profile |          |          |          |          |
| TH01        | 6        | 9.3      |          |          |
| D13S317     | 10       | 11       |          |          |
| TPOX        | 8        | 8        |          |          |
| D18S51      | 13       | 13       |          |          |
| D6S1043     | 12       | 12       |          |          |
| D1S1656     | 13       | 16       |          |          |
| D5S818      | 11       | 12       |          |          |
| D12S391     | 18.3     | 20       |          |          |
| FGA         | 25       | 25       |          |          |

Cell lines with ≥80% match are considered to be related; i.e., derived from a common ancestry. Cell lines with between a 55% to 80% match require further profiling for authentication of relatedness.

The submitted sample profile is human, but not a match for any profile in the DSMZ/ATCC/STR STR databases which include approximately 2455 different type of cells.

The submitted profile is an exact match for the following IGE human cell line(s) in the IGE STR database (8 core loci plus Amelogenin): **CAL-27**

The submitted profile is similar to the following human cell line(s):

| Matches: |               |          |                  |        |         |        |         |       |       |     |      |        |
|----------|---------------|----------|------------------|--------|---------|--------|---------|-------|-------|-----|------|--------|
| NO.      | Percent Match | Cell No. | Cell name        | D5S818 | D13S317 | D7S820 | D16S539 | vWA   | TH01  | AM  | TPOX | CSF1PO |
|          |               |          | Query(Your Cell) | 11,12  | 10,11   | 10,10  | 11,12   | 14,17 | 6,9,3 | X,X | 8,8  | 10,12  |
| 1        | 100%          | 446      | CAL-27           | 11,12  | 10,11   | 10,10  | 11,12   | 14,17 | 6,9,3 | X,X | 8,8  | 10,12  |
| 2        | 100%          | 446      | CAL-27           | 11,12  | 10,11   | 10,10  | 11,12   | 14,17 | 6,9,3 | X,X | 8,8  | 10,12  |



# CELL LINE AUTHENTICATION SERVICE

## STR Profile Report

### STR Typing

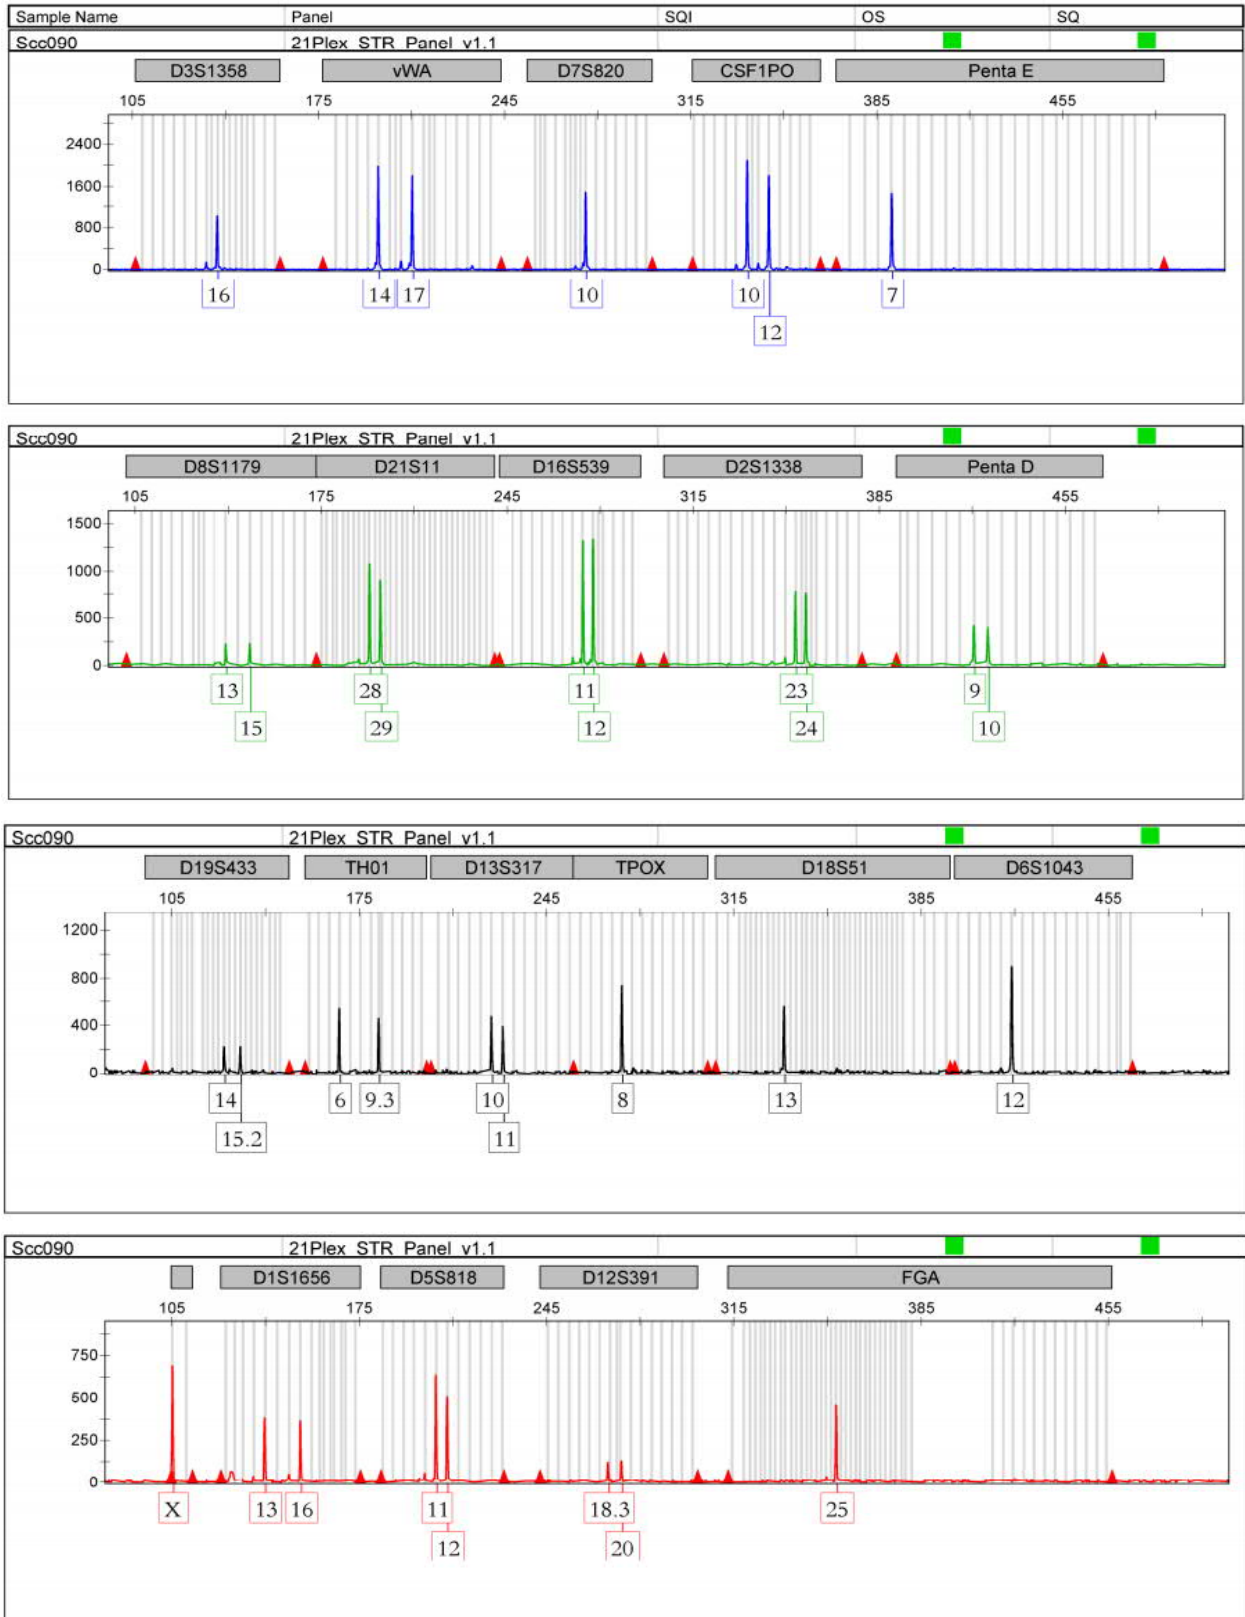





IGE BIOTECH INC., LTD.

## **CELL LINE AUTHENTICATION SERVICE**

### STR Profile Report

#### **Disclaimer:**

IGE Biotechnology performs STR Profiling following ISO 9001:2008 and ISO/IEC 17025:2005 quality standards. There are no warranties with respect to the services or results supplied, express or implied, including, without limitation, any implied warranty of merchantability or fitness for a particular purpose. IGE Biotechnology is not liable for any damages or injuries resulting from receipt and/or improper, inappropriate, negligent or other wrongful use of the test results supplied, and/or from misidentification, misrepresentation, or lack of accuracy of those results. Your exclusive remedy against IGE Biotechnology and those supplying materials used in the services for any losses or damage of any kind whatsoever, whether in contract, tort, or otherwise, shall be, at IGE Biotechnology's option, refund of the fee paid for such service or repeat of the service.

#### **Contact:**

IGE Biotechnology Inc. LTD.  
020-89053723  
info@igebio.com  
12 3rd Luoxuan Rd., Building 4 Room 505  
Guangzhou International Biotech Island  
Guangzhou, China 510320  
<http://www.igebio.com>

Original western blots

Figure 1F

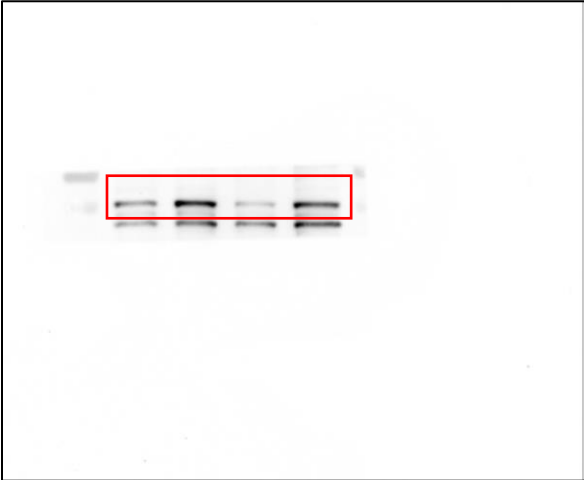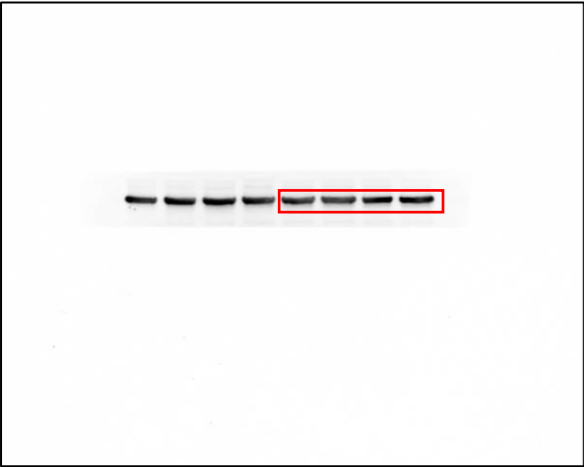

Figure 1I

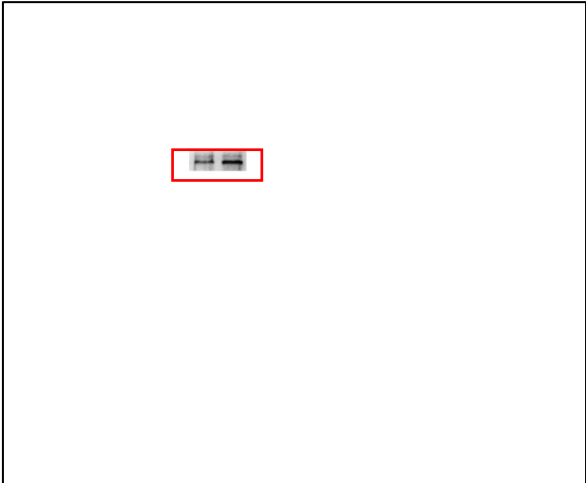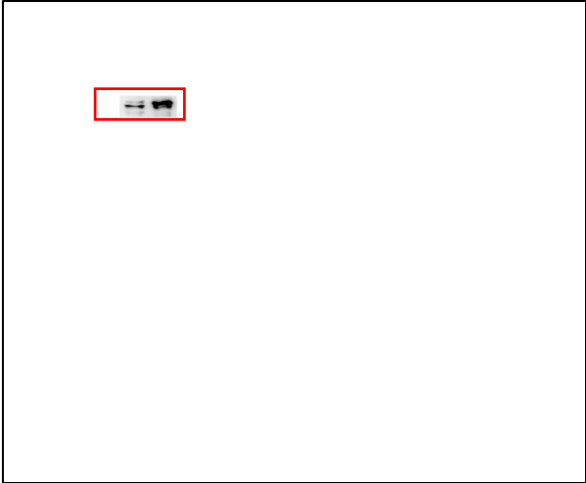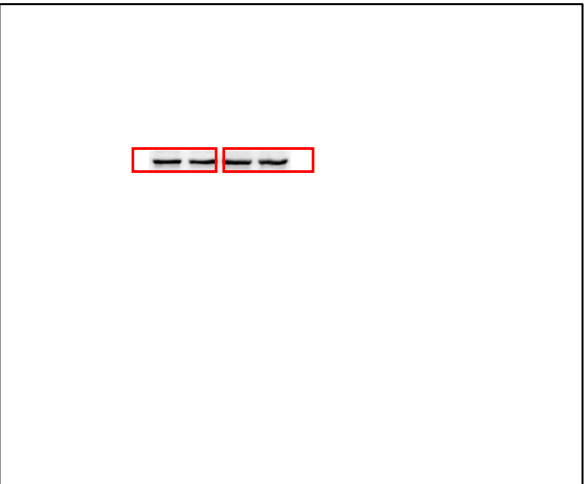

Figure 2C

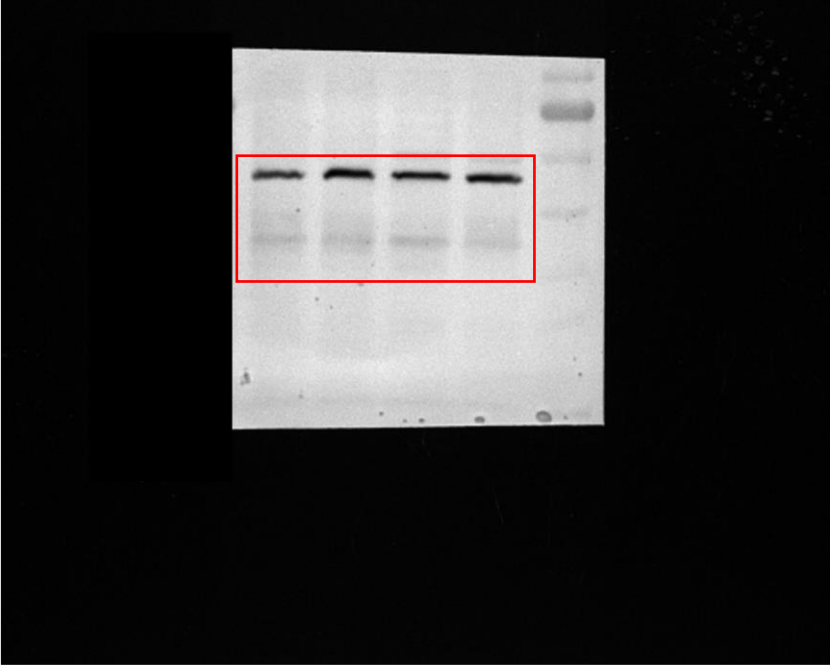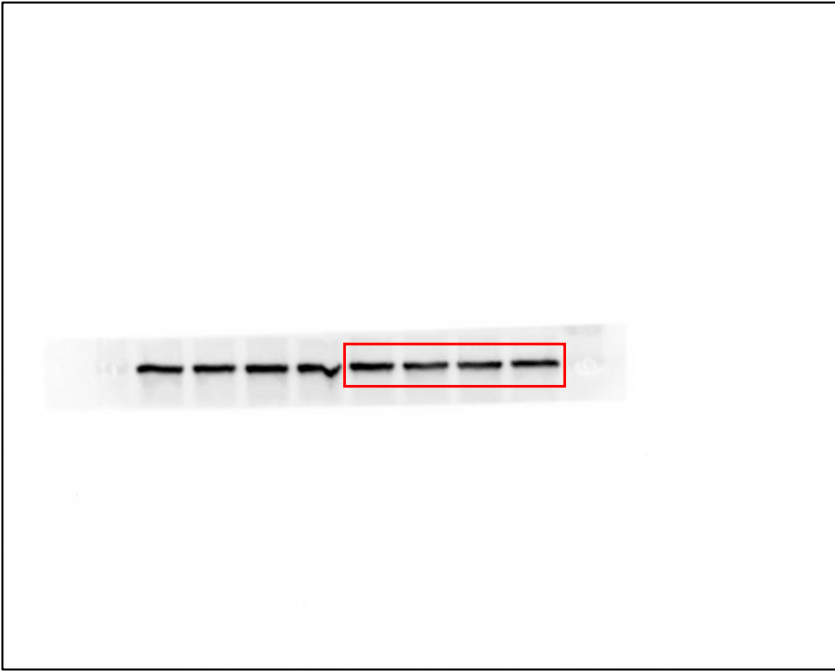

Figure 2G

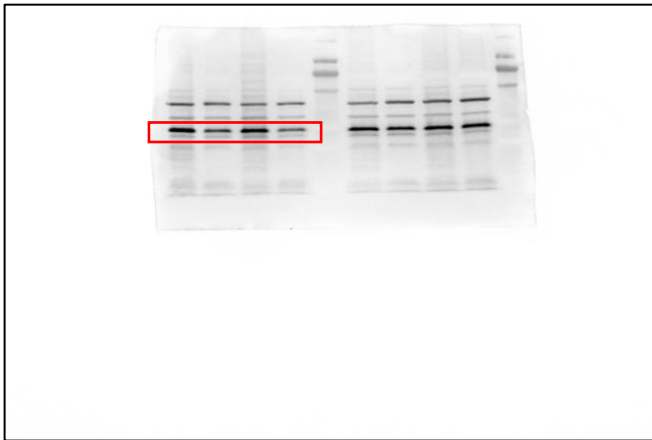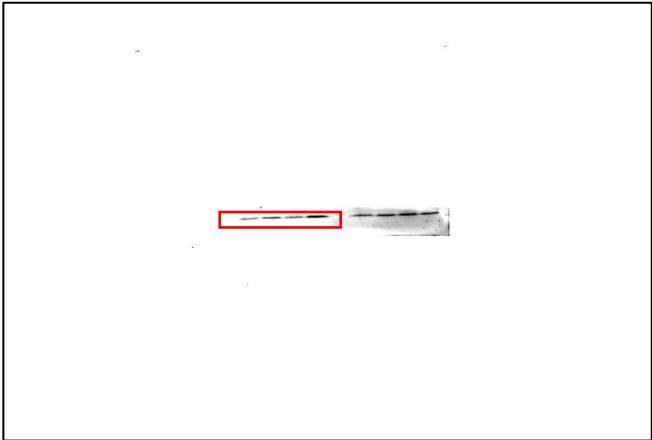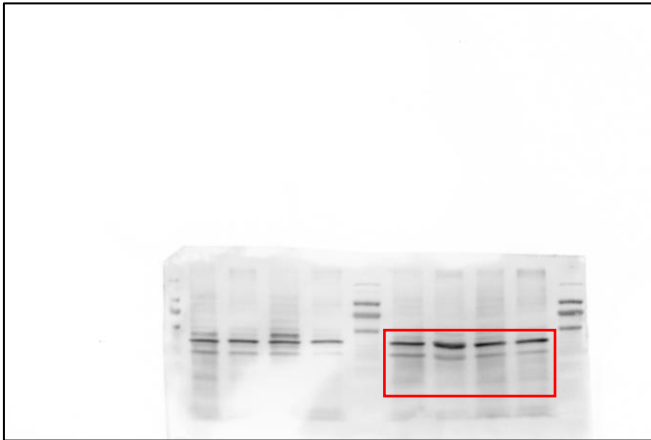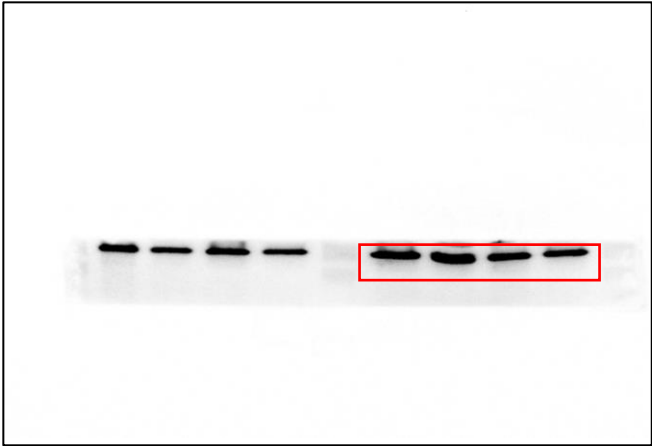

Figure 3A

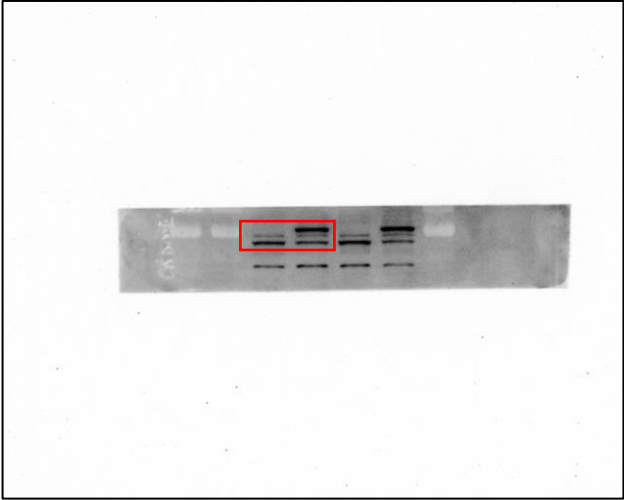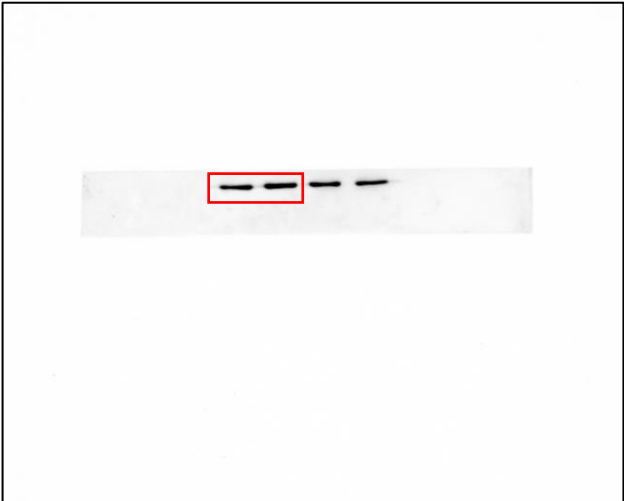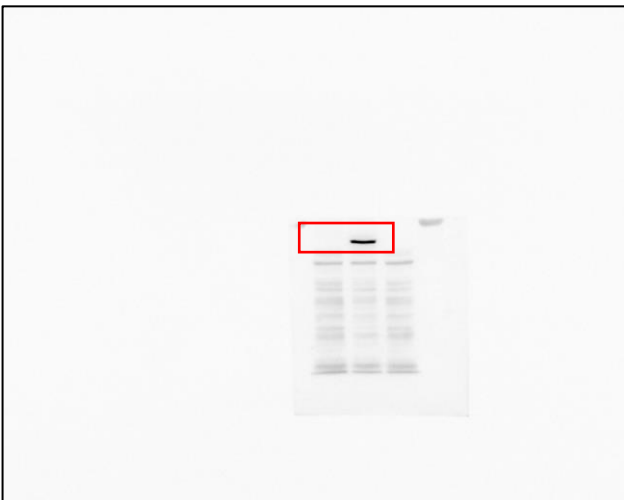

Figure 3D

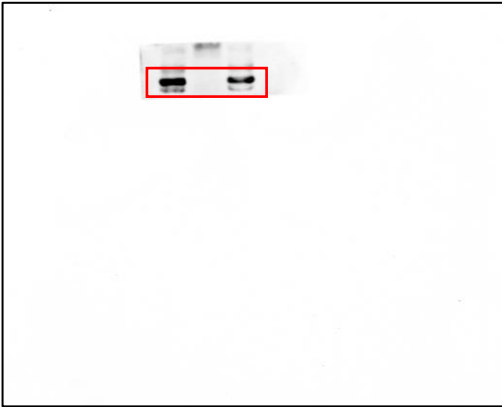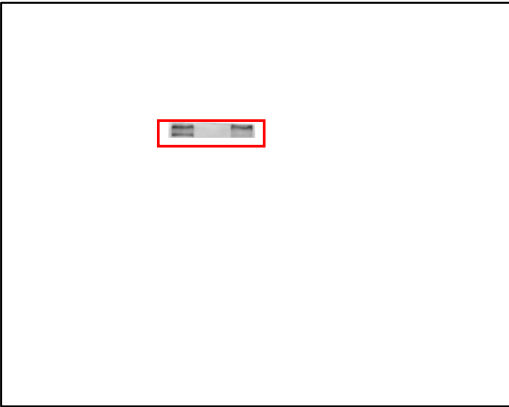

Figure 3E

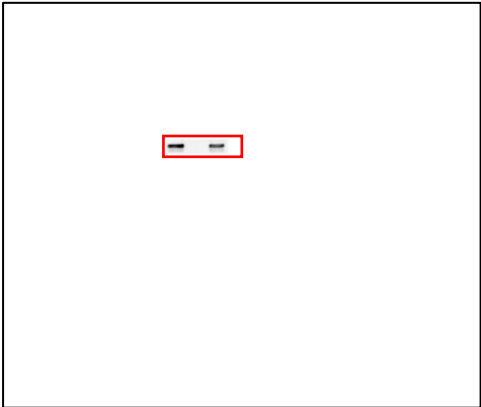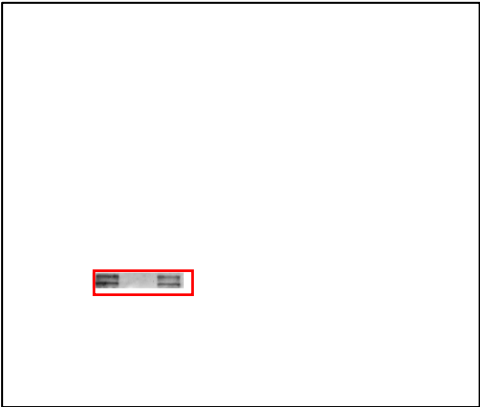



Figure 3F

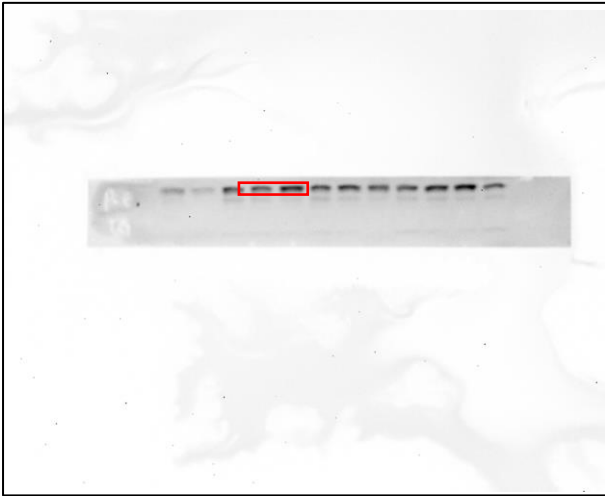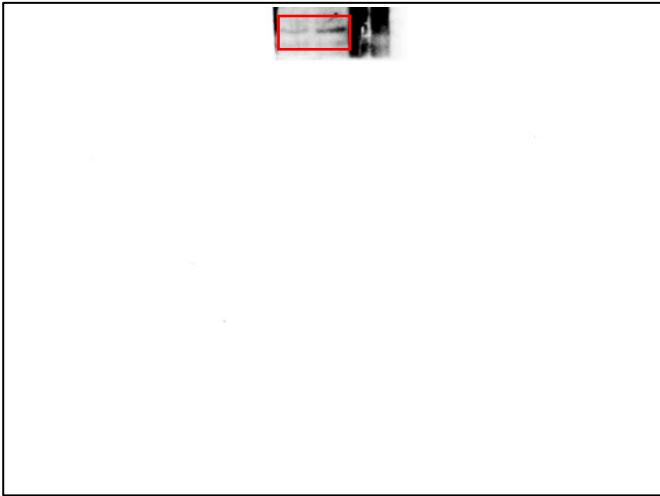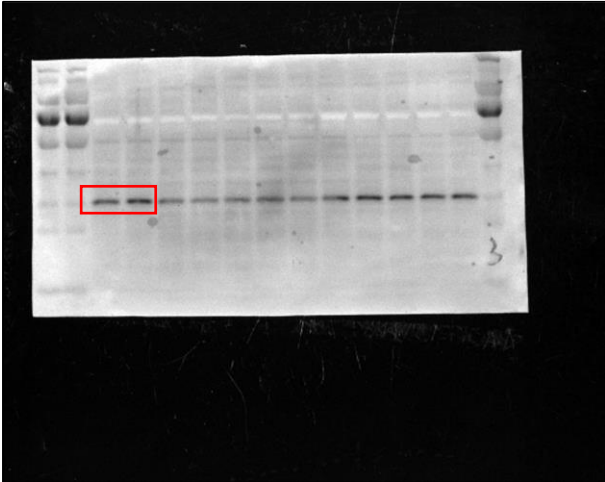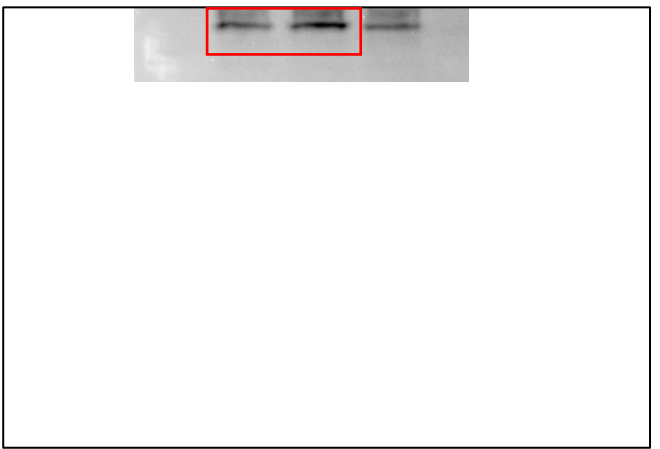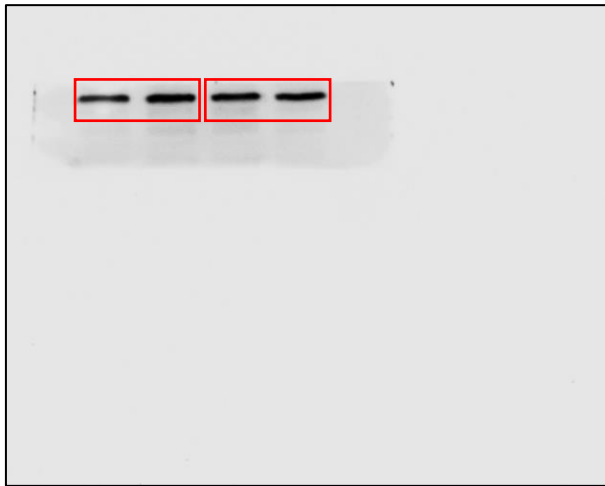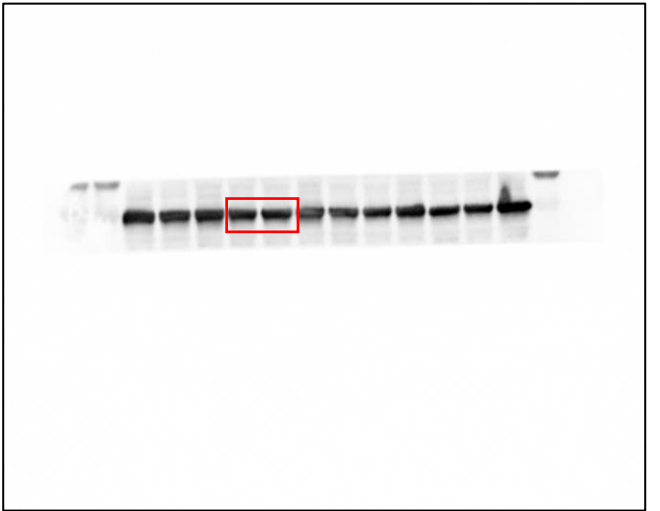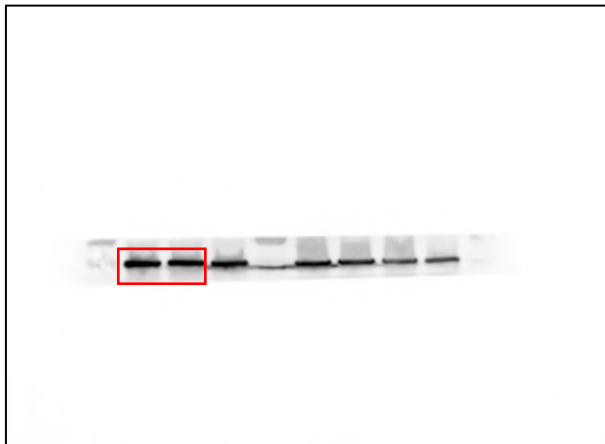

Figure 3G

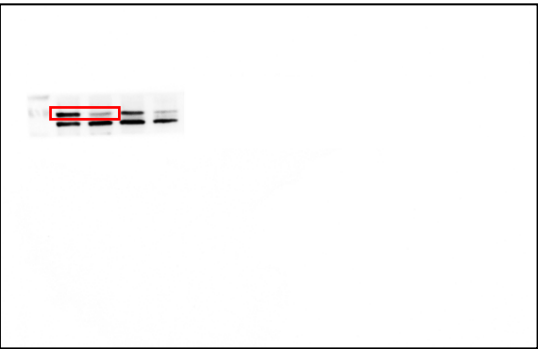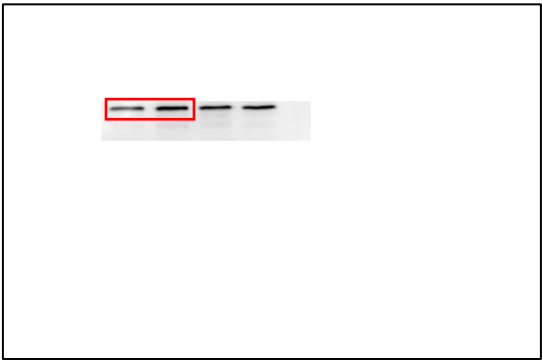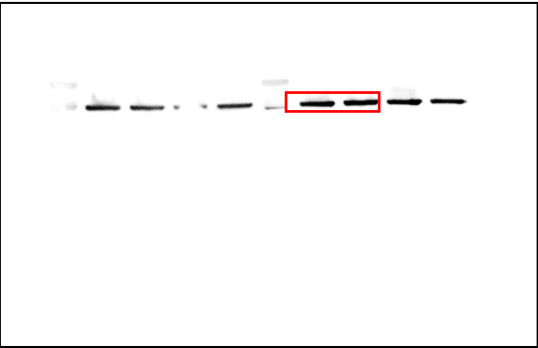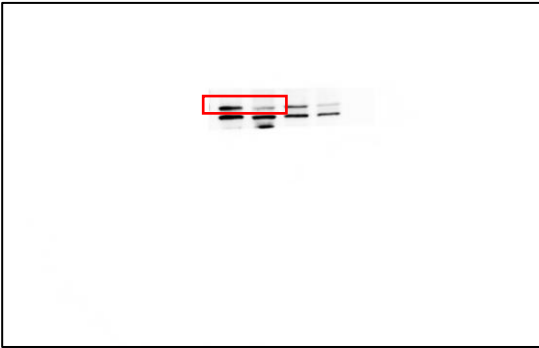

Figure 4A、 B

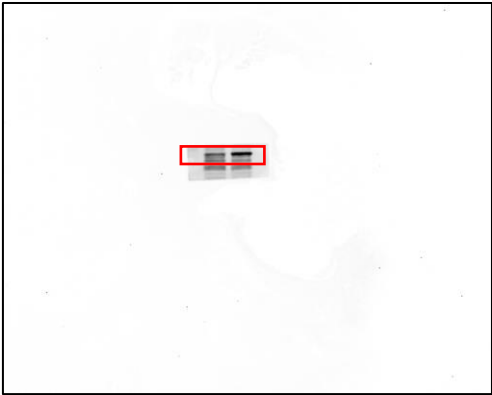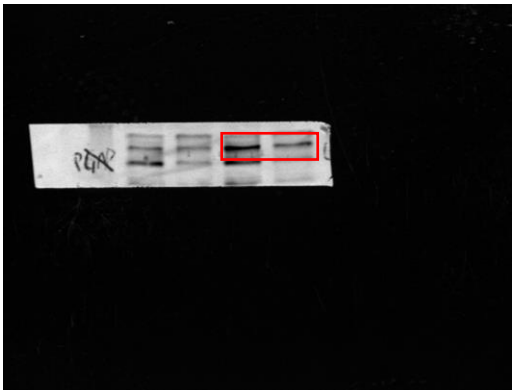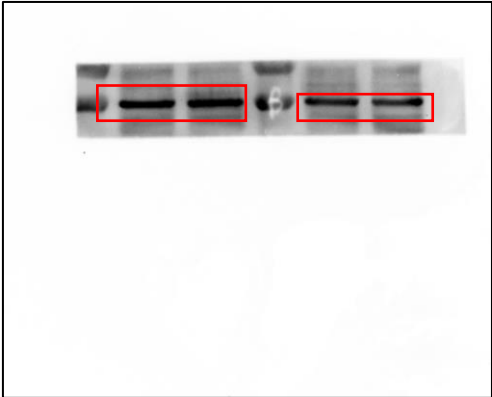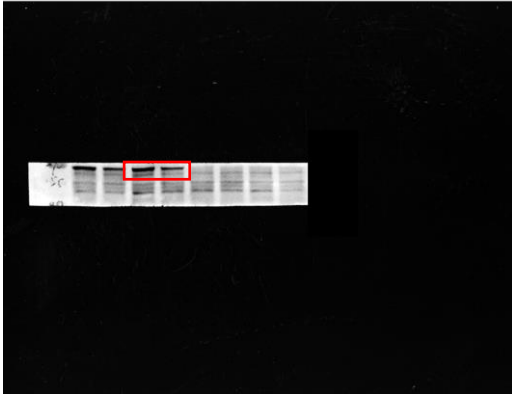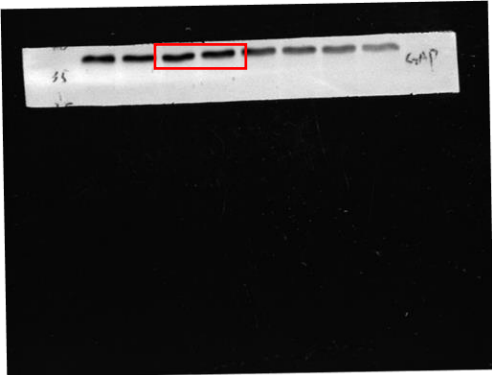

Figure 4C

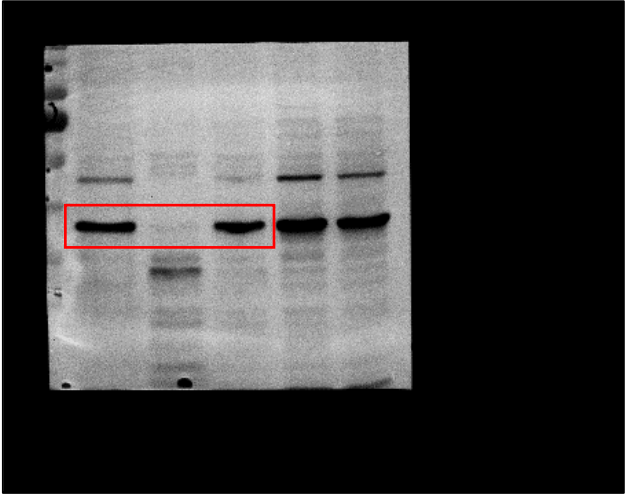

Figure 4D

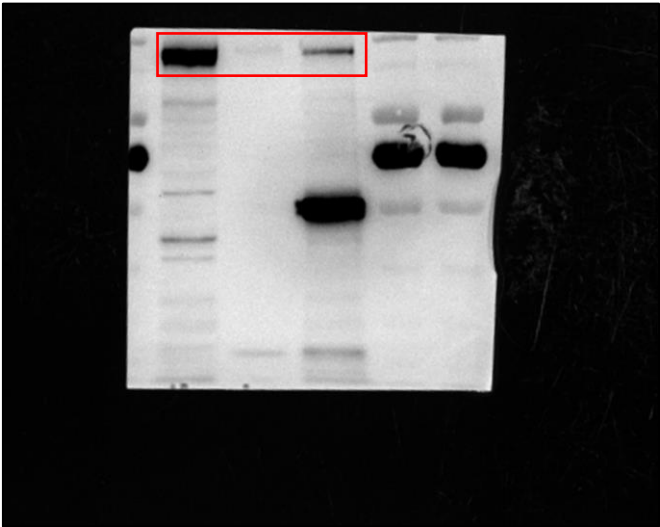

Figure 4E

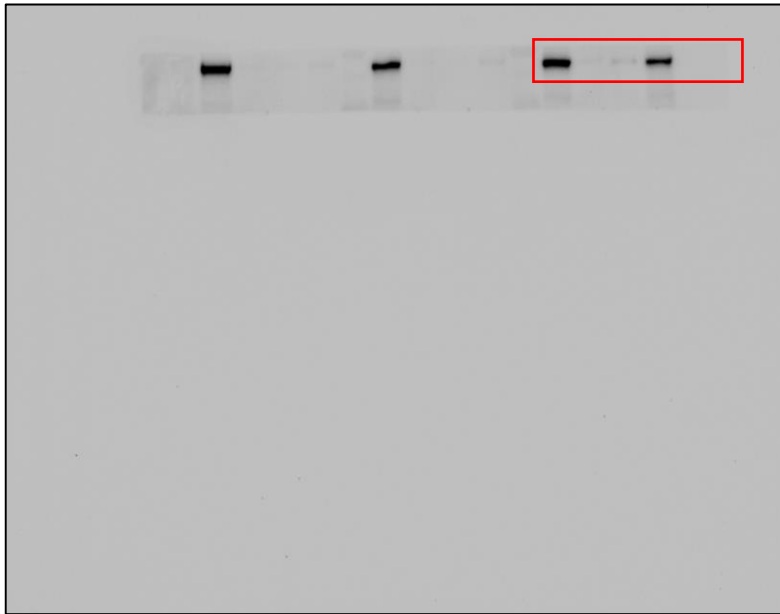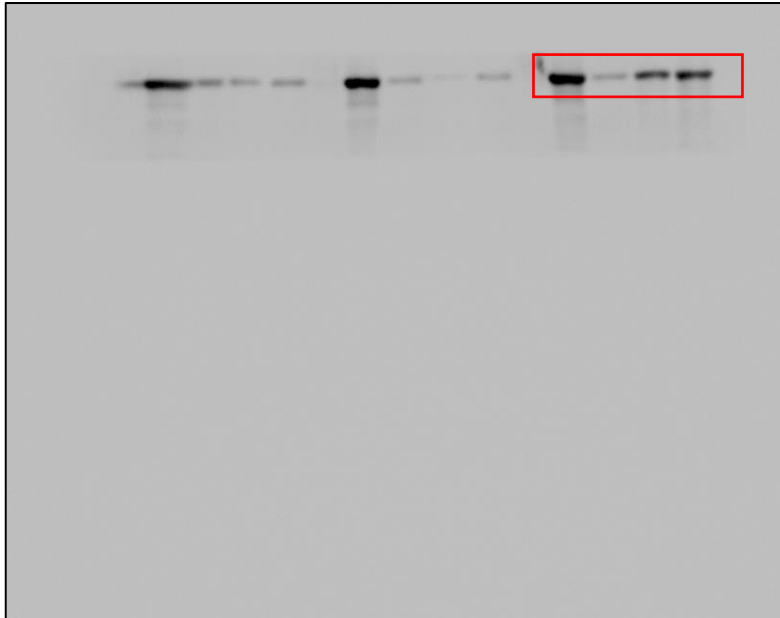

Figure 4F

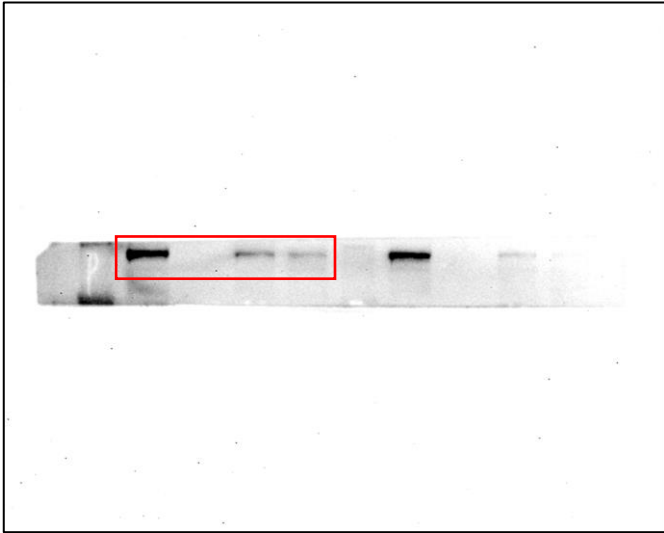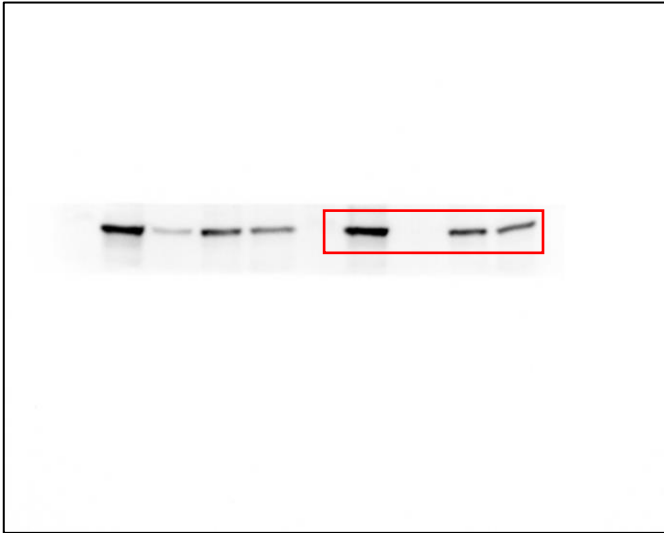

Figure 5A

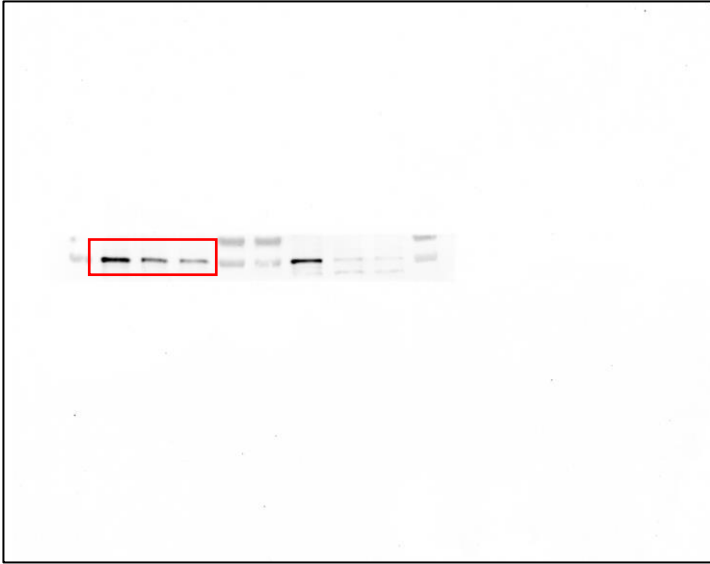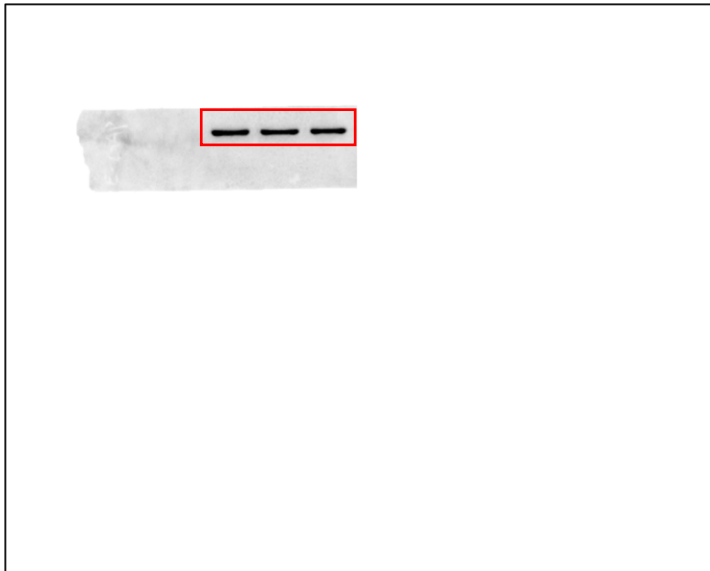

Figure 5B

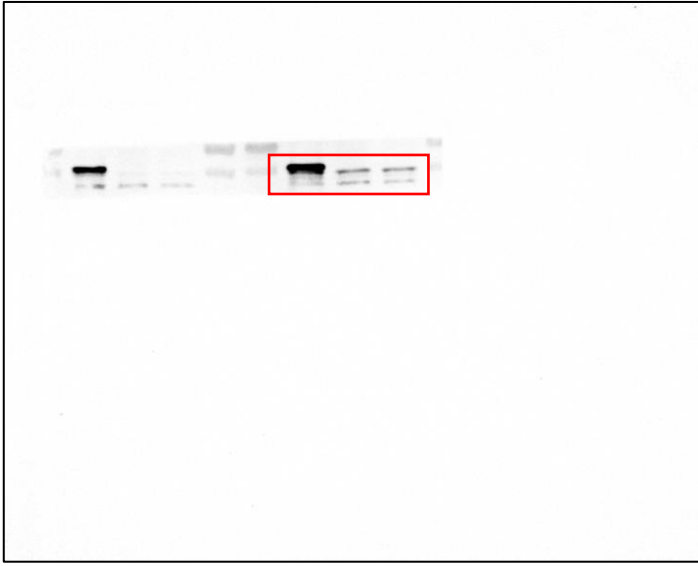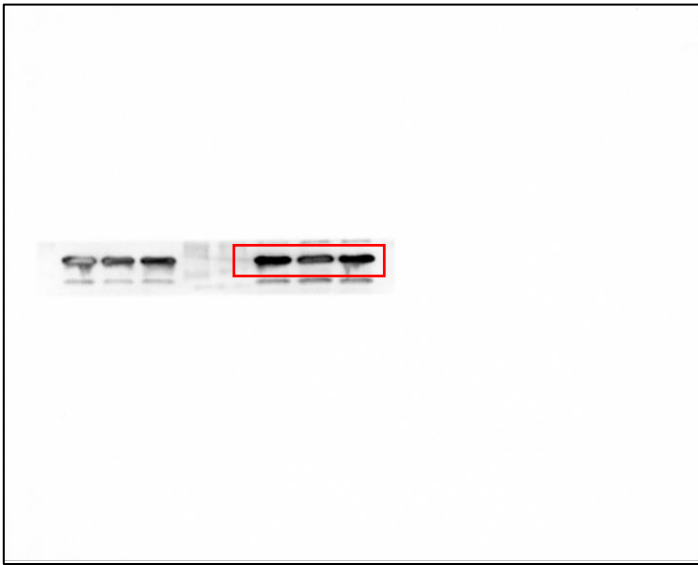



Figure 6F

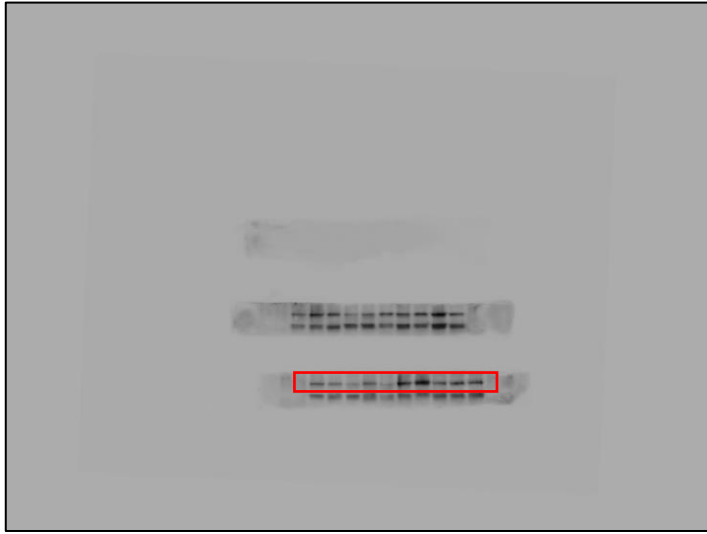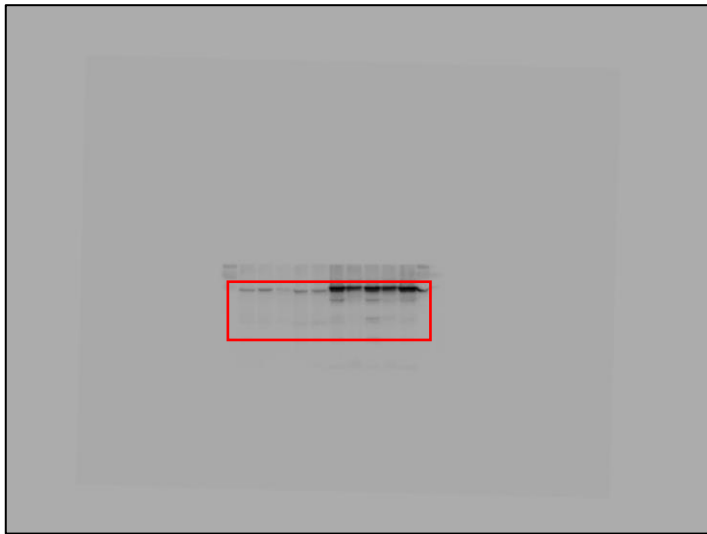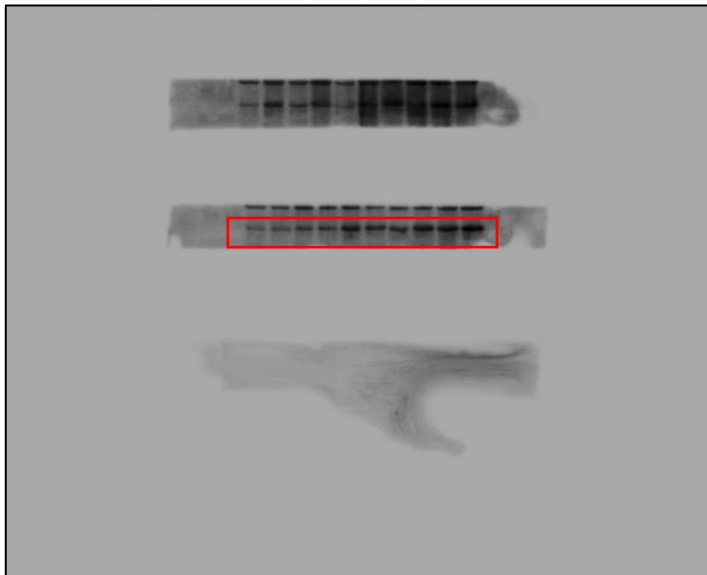

Figure S4

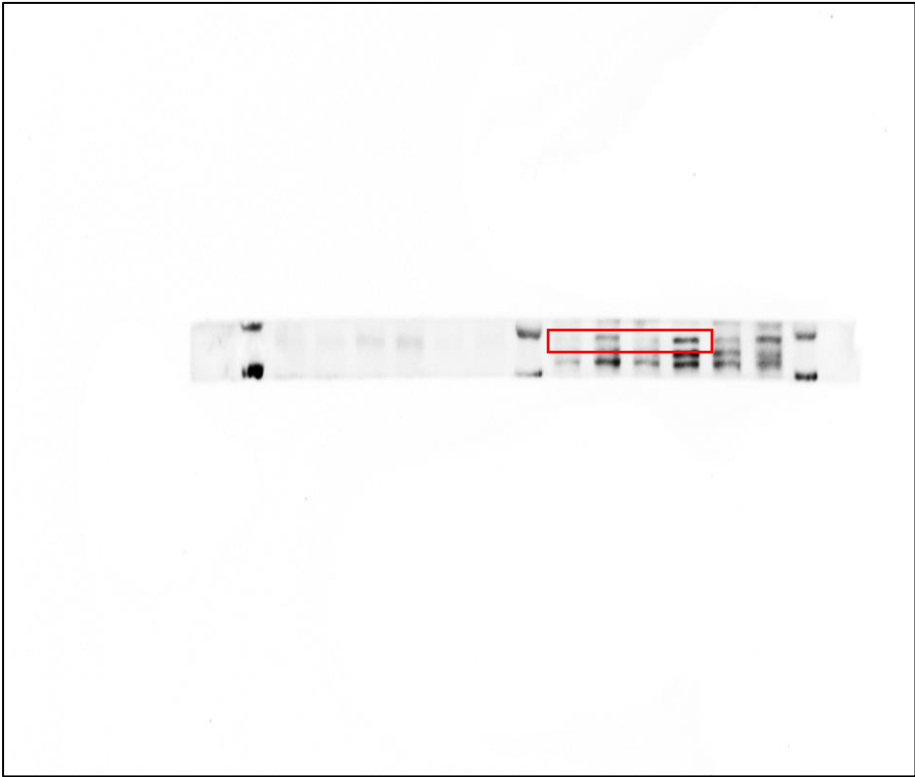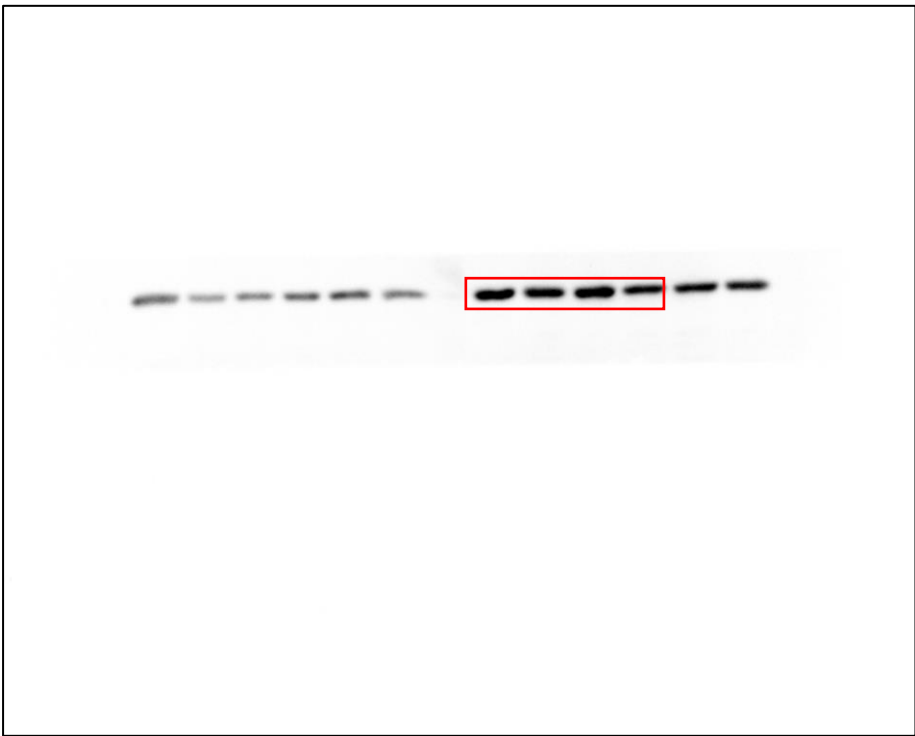

Figure S7

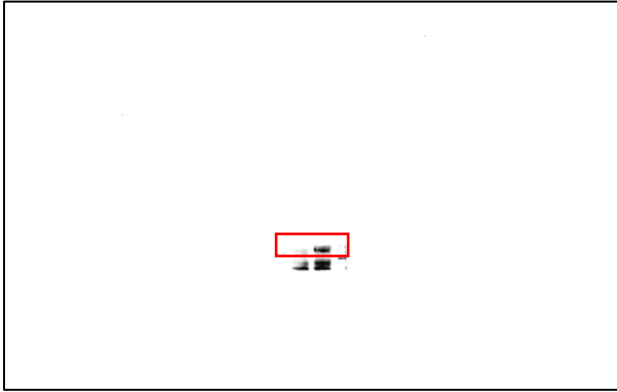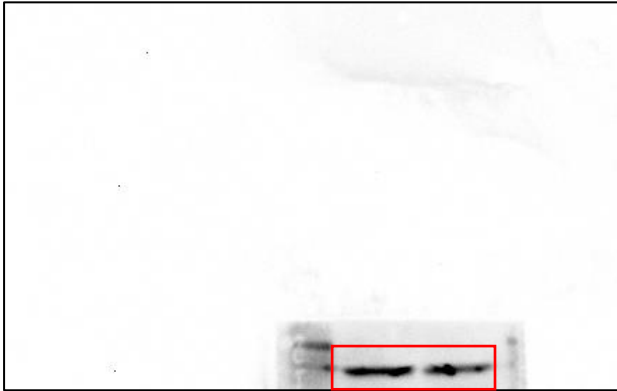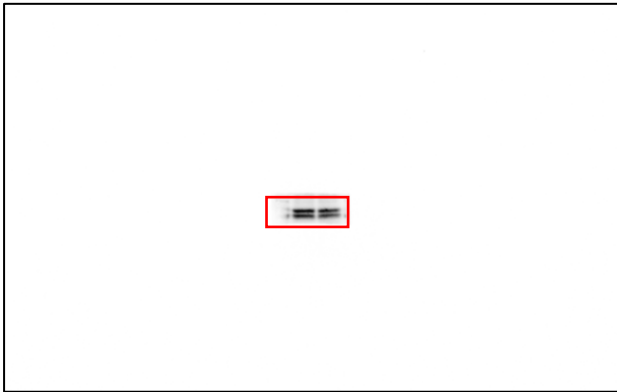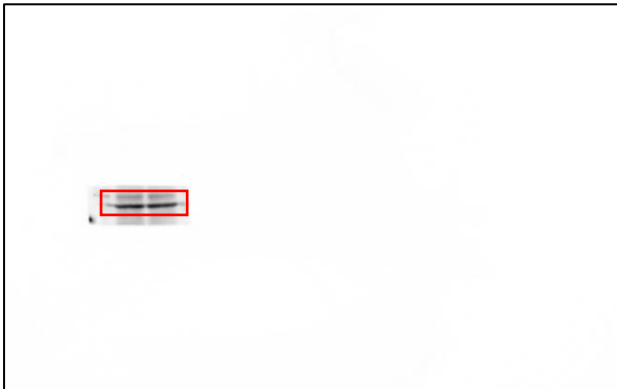

Figure S8

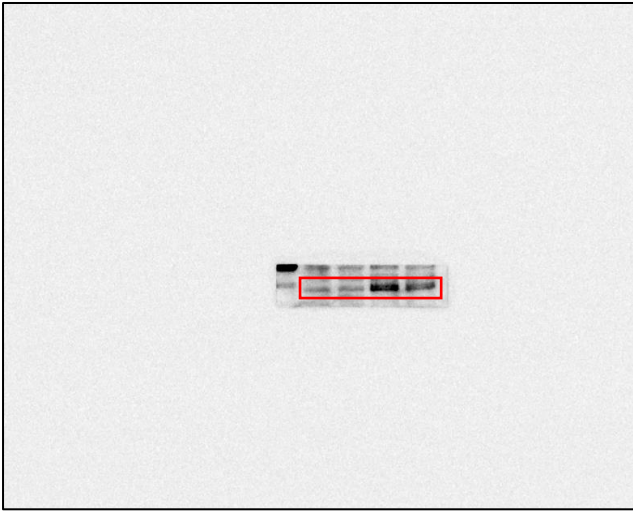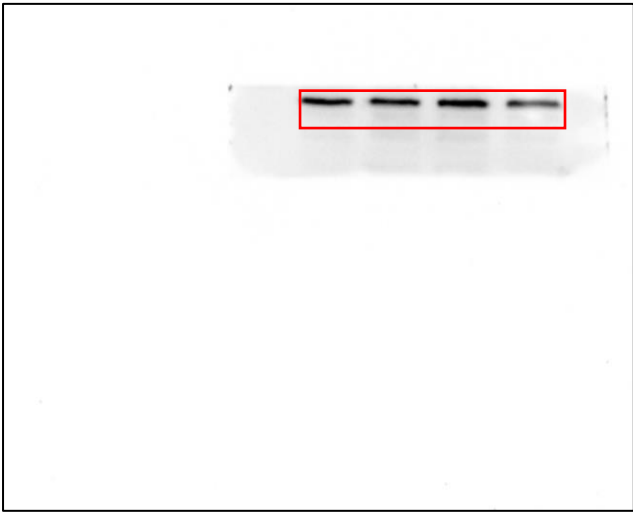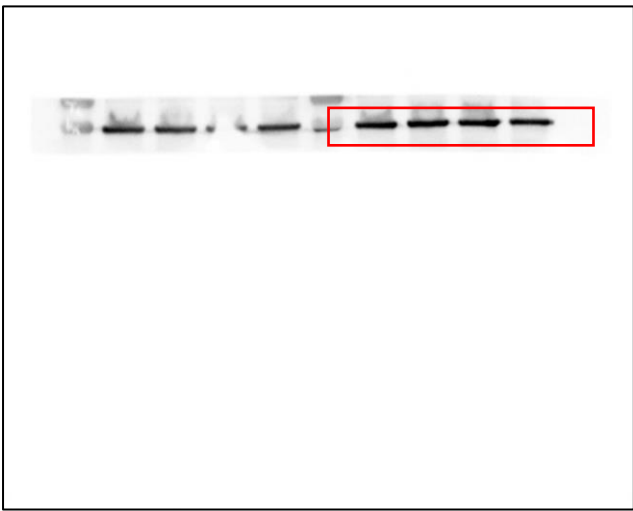

Figure S9

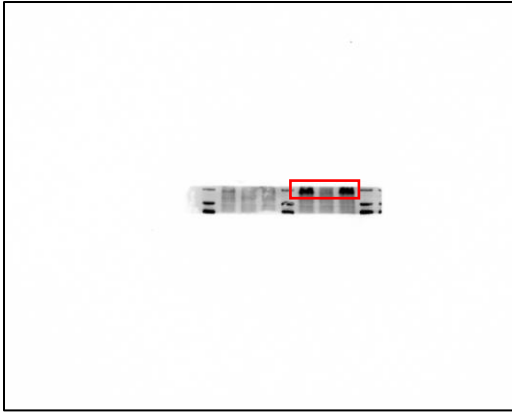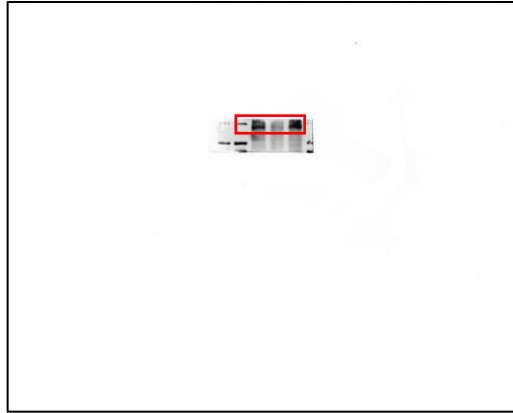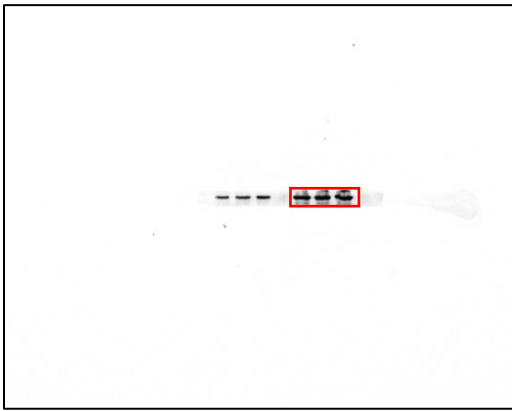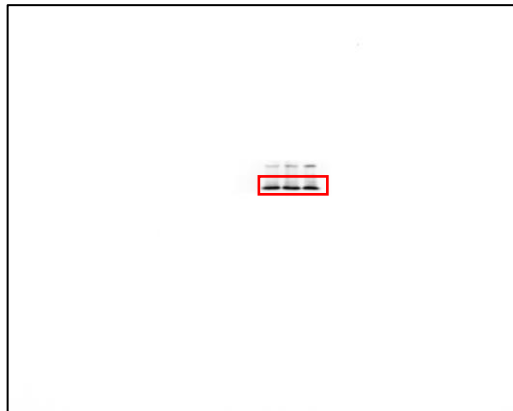

Figure S10

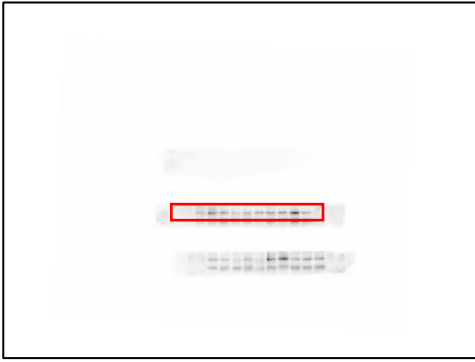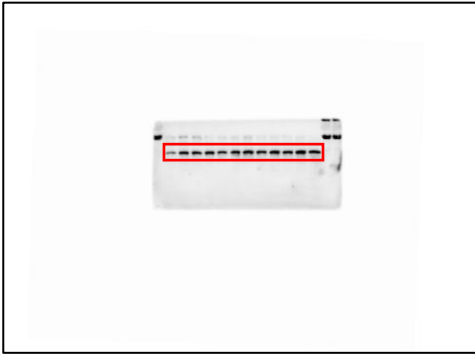

Figure S11

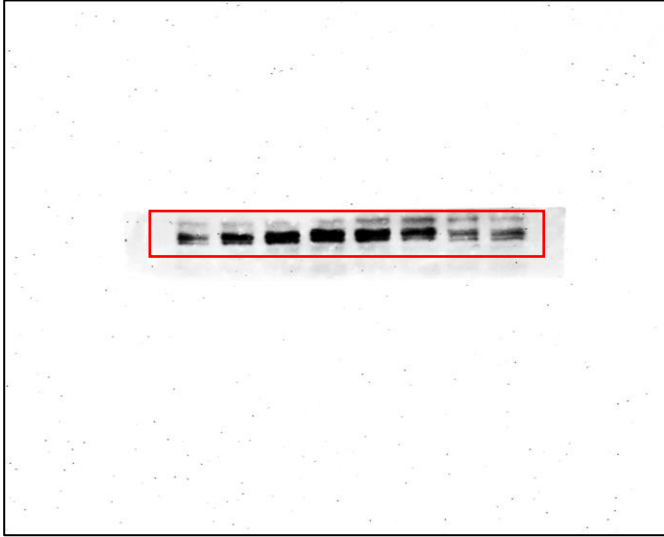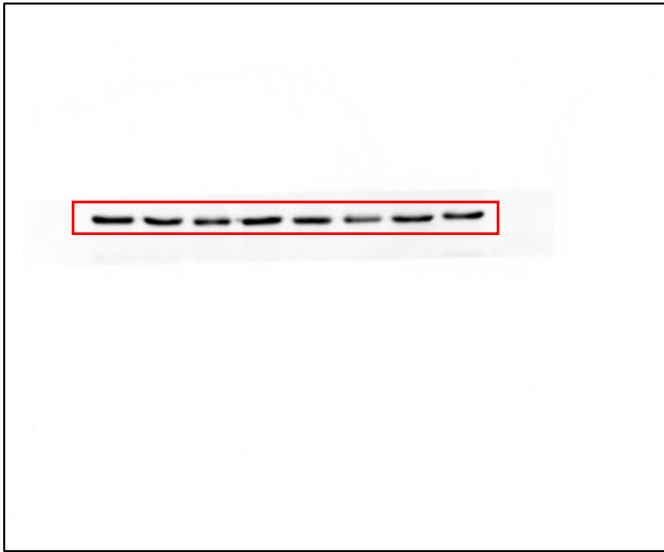

Supplement: 41420_2022_915_MOESM1_ESM.pdf [file 41420_2022_915_MOESM1_ESM.pdf]
